# Supplementary material
Source: MDPI journal article supplement (https://www.mdpi.com/2071-1050/10/4/1300)
Supplement: s1 [file s1]

| ID | Journal | Authors             | Title Primary                                                                                         | Pub Year | Keywords                       |
|----|---------|---------------------|-------------------------------------------------------------------------------------------------------|----------|--------------------------------|
| 1  | PMJ     | Bryde, David J.     | Project management priorities and the link with performance management systems                        | 2007     | project management practices   |
|    |         | Wright, Gillian H.  |                                                                                                       |          | project performance            |
|    |         |                     |                                                                                                       |          | performance management systems |
| 2  | PMJ     | Maylor, Harvey      | Managerial complexity in project-based operations: A grounded model and its implications for practice | 2008     | projects                       |
|    |         | Vidgen, Richard     |                                                                                                       |          | managerial complexity          |
|    |         | Carver, Stephen     |                                                                                                       |          | structural                     |
|    |         |                     |                                                                                                       |          | dynamic                        |
|    |         |                     |                                                                                                       |          | MODeST                         |
|    |         |                     |                                                                                                       |          | contextualization              |
| 3  | PMJ     | Crawford, Lynn      | Governance and support in the sponsoring of projects and programs                                     | 2008     | sponsor                        |
|    |         | Cooke-Davies, Terry |                                                                                                       |          | project management             |
|    |         | Hobbs, Brian        |                                                                                                       |          | program management             |
|    |         | Labuschagne, Les    |                                                                                                       |          | governance                     |
|    |         | Remington, Kaye     |                                                                                                       |          |                                |
|    |         | Chen, Ping          |                                                                                                       |          |                                |
| 4  | DMT     | Khang, Do Ba        | Success criteria and factors for international development                                            | 2008     | project success criteria       |
|    |         | Moe, Tun Lin        |                                                                                                       |          | critical success factors       |

|   |     |                   |                                                                                                                       |      |                                    |
|---|-----|-------------------|-----------------------------------------------------------------------------------------------------------------------|------|------------------------------------|
|   |     |                   | projects: A life-cycle-based framework                                                                                | 2000 | project life cycle                 |
|   |     |                   |                                                                                                                       |      | international development projects |
| 5 | PMJ | Zhai, L.          | Understanding the value of project management from a stakeholder's perspective: Case study of mega-project management | 2009 | mega-project                       |
|   |     | Xin, Y.           |                                                                                                                       |      | project management                 |
|   |     | Cheng, C.         |                                                                                                                       |      | value                              |
|   |     |                   |                                                                                                                       |      | stakeholder                        |
| 6 | PMJ | Pernille Eskerod  | Project management models as value creators                                                                           | 2009 | project management model           |
|   |     | Eva Riis          |                                                                                                                       |      | value                              |
|   |     |                   |                                                                                                                       |      | stakeholder                        |
|   |     |                   |                                                                                                                       |      | efficiency                         |
|   |     |                   |                                                                                                                       |      | legitimacy                         |
|   |     |                   |                                                                                                                       |      | power                              |
|   |     |                   |                                                                                                                       |      | control                            |
|   |     |                   |                                                                                                                       |      |                                    |
| 7 | PMJ | Crawford, Lynn H. | Government and governance: The value of project management in the public sector                                       | 2009 | public sector                      |
|   |     | Helm,Jane         |                                                                                                                       |      | governance                         |
|   |     |                   |                                                                                                                       |      | value                              |
|   |     |                   |                                                                                                                       |      | project management                 |
|   |     | Couillard, Jean   |                                                                                                                       |      | Logical Framework Approach         |

|    |     |                                |                                                                                                                                         |      |                                        |
|----|-----|--------------------------------|-----------------------------------------------------------------------------------------------------------------------------------------|------|----------------------------------------|
| 8  | PMJ | Garon, Serge                   | The Logical Framework Approach - Millennium                                                                                             | 2009 | project design and evaluation          |
|    |     | Riznic, Jovica                 |                                                                                                                                         |      | stakeholders' involvement              |
|    |     |                                |                                                                                                                                         |      | integrated project management approach |
| 9  | PMJ | Soudain, Laurence<br>Lecoeuvre | Positioning of the stakeholders in the interaction project management - project marketing: A case of a coconstructed industrial project | 2009 | project marketing                      |
|    |     | Deshayes, Philippe             |                                                                                                                                         |      | project management                     |
|    |     | Tikkanen, Henrikki             |                                                                                                                                         |      | milieu                                 |
|    |     |                                |                                                                                                                                         |      | interaction                            |
|    |     |                                |                                                                                                                                         |      | congruencies                           |
| 10 | PMJ | Meier, Steven R.               | Causal inferences on the cost overruns and schedule delays of large-scale U.S. federal defense and intelligence acquisition programs    | 2010 | acquisition management                 |
|    |     |                                |                                                                                                                                         |      | aerospace industry                     |
|    |     |                                |                                                                                                                                         |      | human resources                        |
|    |     |                                |                                                                                                                                         |      | federal government                     |
|    |     |                                |                                                                                                                                         |      | stakeholders                           |
| 11 | DMT | S. Andersen, Erling            | Are we getting any better? Comparing project management                                                                                 | 2010 | project management                     |
|    |     |                                |                                                                                                                                         |      | performance                            |

|    |     |                     |                                                                                                    |      |                              |
|----|-----|---------------------|----------------------------------------------------------------------------------------------------|------|------------------------------|
| 11 | PMJ |                     | in the years 2000 and 2008                                                                         | 2010 | progress                     |
|    |     |                     |                                                                                                    |      | IPO model                    |
| 12 | PMJ | Littau, P.          | 25 years of stakeholder theory in project management literature (1984 -2009)                       | 2010 | stakeholder theory           |
|    |     | Jujagiri, N. J.     |                                                                                                    |      | project management           |
|    |     | Adlbrecht, G.       |                                                                                                    |      | literature Reviews           |
| 13 | PMJ | Rose, Timothy M.    | Financial incentives and advanced construction procurement systems                                 | 2010 | goal commitment              |
|    |     | Manley, Karen       |                                                                                                    |      | financial incentives         |
|    |     |                     |                                                                                                    |      | contracts                    |
|    |     |                     |                                                                                                    |      | construction project         |
|    |     |                     |                                                                                                    |      | motivation                   |
|    |     |                     |                                                                                                    |      | built environment            |
| 14 | PMJ | Liisa Sallinen      | Governmental stakeholder and project owner's views on the regulative framework in nuclear projects | 2011 | governmental stakeholder     |
|    |     | Tuomas Ahola        |                                                                                                    |      | nuclear project              |
|    |     | Inkeri Ruuska       |                                                                                                    |      | project owner                |
|    |     |                     |                                                                                                    |      | institutional theory         |
|    |     |                     |                                                                                                    |      | regulative framework         |
| 15 | PMJ | Lizarralde, Gonzalo | Structuring of temporary multi-organizations: Contingency                                          | 2011 | temporary multi-organization |
|    |     | Blois, Michel de    |                                                                                                    |      | contingency theory           |

|    |     |                    |                                                                                                                            |      |                                 |
|----|-----|--------------------|----------------------------------------------------------------------------------------------------------------------------|------|---------------------------------|
| 15 | PMJ | Latunova, Iskra    | theory in the building sector                                                                                              | 2011 | procurement, human organization |
|    |     |                    |                                                                                                                            |      | project team                    |
| 16 | PMJ | de Bakker, Karel   | Risk management affecting IS/IT project success through communicative action                                               | 2011 | managing risk                   |
|    |     | Boonstra, Albert   |                                                                                                                            |      | project success                 |
|    |     | Wortmann, Hans     |                                                                                                                            |      | information technology          |
|    |     |                    |                                                                                                                            |      | case studies                    |
|    |     |                    |                                                                                                                            |      | communicative action            |
| 17 | PMJ | Baroudi, Bassam    | Prequalification: Using systems to problem dissolve                                                                        | 2011 | prequalification                |
|    |     | Metcalf, Mike      |                                                                                                                            |      | concept shifting                |
|    |     |                    |                                                                                                                            |      | problem dissolving              |
|    |     |                    |                                                                                                                            |      | systems thinking                |
| 18 | PMJ | Beringer, C.       | Establishing Project Portfolio Management: An Exploratory Analysis of the Influence of Internal Stakeholders' Interactions | 2012 | project portfolio management    |
|    |     | Jonas, D.          |                                                                                                                            |      | project portfolio stakeholders  |
|    |     | Georg Gemünden, H. |                                                                                                                            |      | stakeholder management          |
|    |     |                    |                                                                                                                            |      | stakeholder theory              |

|    |     |                       |                                                                                                                                                       |      |                                            |
|----|-----|-----------------------|-------------------------------------------------------------------------------------------------------------------------------------------------------|------|--------------------------------------------|
|    |     |                       |                                                                                                                                                       |      | stakeholder behavior                       |
|    |     |                       |                                                                                                                                                       |      |                                            |
| 19 | PMJ | Turner, Rodney        | Forecasting Success on Large Projects: Developing Reliable Scales to Predict Multiple Perspectives by Multiple Stakeholders Over Multiple Time Frames | 2012 | project success criteria                   |
|    |     | Zolin, Roxanne        |                                                                                                                                                       |      | project success factors                    |
|    |     |                       |                                                                                                                                                       |      | project failure factors                    |
|    |     |                       |                                                                                                                                                       |      | leading performance indicators             |
|    |     |                       |                                                                                                                                                       |      | stakeholders                               |
|    |     |                       |                                                                                                                                                       |      | project complexity                         |
| 20 | PMJ | McLeod, Laurie        | A Perspective-Based Understanding of Project Success                                                                                                  | 2012 | project evaluation                         |
|    |     | Doolin, Bill          |                                                                                                                                                       |      | project success criteria                   |
|    |     | MacDonell, Stephen G. |                                                                                                                                                       |      | stakeholder perspectives                   |
|    |     |                       |                                                                                                                                                       |      | longitudinal case study                    |
|    |     |                       |                                                                                                                                                       |      | outsourced information systems development |
|    |     | Chou, Jui-Sheng       |                                                                                                                                                       |      | PMBOK® Guide                               |
|    |     | Yang, Jung-Ghun       |                                                                                                                                                       |      | perceived performance                      |

|    |     |                          |                                                                                               |      |                              |
|----|-----|--------------------------|-----------------------------------------------------------------------------------------------|------|------------------------------|
| 21 | PMJ |                          | Project Management Knowledge and Effects on Construction Project Outcomes: An Empirical Study | 2012 | customer satisfaction        |
|    |     |                          |                                                                                               |      | project success              |
|    |     |                          |                                                                                               |      | structural equation model    |
| 22 | PMJ | Tadege Shiferaw, Asmamaw | Governance of Public Investment Projects in Ethiopia                                          | 2012 | decision making              |
|    |     | Jonny Klakegg,Ole        |                                                                                               |      | project governance           |
|    |     | Haavaldsen,Tore          |                                                                                               |      | public investment projects   |
|    |     |                          |                                                                                               |      | relevance                    |
|    |     |                          |                                                                                               |      | sustainability               |
| 23 | PMJ | Thamhain,Hans            | Managing Risks in Complex Projects                                                            | 2013 | project management practices |
|    |     |                          |                                                                                               |      | performance                  |
|    |     |                          |                                                                                               |      | maturity                     |
|    |     |                          |                                                                                               |      | risk management              |
|    |     |                          |                                                                                               |      | project management           |
|    |     |                          |                                                                                               |      | complexity                   |
|    |     |                          |                                                                                               |      | high-technology companies    |
|    |     |                          |                                                                                               |      | new product development      |
|    |     |                          |                                                                                               |      | leadership                   |
|    |     |                          |                                                                                               |      |                              |

|    |     |                    |                                                                                                                                  |      |                                   |
|----|-----|--------------------|----------------------------------------------------------------------------------------------------------------------------------|------|-----------------------------------|
|    |     |                    |                                                                                                                                  |      | teamwork                          |
| 24 | PMJ | Müller, Ralf       | A relational typology of project management offices                                                                              | 2013 | PMO                               |
|    |     | Glückler, Johannes |                                                                                                                                  |      | PMO networks                      |
|    |     | Aubry, Monique     |                                                                                                                                  |      | relational typology               |
|    |     |                    |                                                                                                                                  |      | organizational slack              |
|    |     |                    |                                                                                                                                  |      | innovation                        |
|    |     |                    |                                                                                                                                  |      | learning                          |
| 25 | PMJ | Yuan, Hongping     | Critical management measures<br>contributing to construction<br>waste management<br>evidence from construction projects in China | 2013 | construction waste                |
|    |     |                    |                                                                                                                                  |      | management measure                |
|    |     |                    |                                                                                                                                  |      | factor analysis                   |
|    |     |                    |                                                                                                                                  |      | construction project, China       |
| 26 | PMJ | Eskerod, P.        | Stakeholder Management Strategies and Practices During a<br>Project Course                                                       | 2014 | stakeholder theory                |
|    |     | Vaagaasar, A. L.   |                                                                                                                                  |      | trust                             |
|    |     |                    |                                                                                                                                  |      | practice approach                 |
|    |     |                    |                                                                                                                                  |      | stakeholder management strategies |
|    |     |                    |                                                                                                                                  |      | help and harm potentials          |
|    |     |                    |                                                                                                                                  |      | development project               |



|    |     |                     |                                                                                                                                       |      |                                |
|----|-----|---------------------|---------------------------------------------------------------------------------------------------------------------------------------|------|--------------------------------|
|    |     |                     |                                                                                                                                       |      | case study                     |
| 27 | PMJ | Rebecca J. Yang     | Stakeholders' Attributes, Behaviors, and Decision-Making Strategies in Construction Projects: Importance and Correlations in Practice | 2014 | decision-making strategies     |
|    |     | Yaowu Wang          |                                                                                                                                       |      | stakeholder attributes         |
|    |     | Xiao-Hua Jin        |                                                                                                                                       |      | stakeholder behaviors          |
|    |     |                     |                                                                                                                                       |      | construction projects          |
| 28 | PMJ | Müller, Ralf        | Ethics, Trust, and Governance in Temporary Organizations                                                                              | 2014 | project governance             |
|    |     | Turner, J. Rodney   |                                                                                                                                       |      | governance of projects         |
|    |     | Andersen, Erling S. |                                                                                                                                       |      | trust                          |
|    |     | Shao, Jingting      |                                                                                                                                       |      | ethics                         |
|    |     | Kvalnes, Øyvind     |                                                                                                                                       |      | ethical issues                 |
| 29 | PMJ | Pernille Eskerod    | Project Stakeholder Management — Past and Present                                                                                     | 2015 | stakeholder thinking           |
|    |     | Martina Huemann     |                                                                                                                                       |      | project stakeholder management |
|    |     | Grant Savage        |                                                                                                                                       |      | stakeholder theory             |
|    |     |                     |                                                                                                                                       |      | stakeholders                   |
| 30 | PMJ | Kirsi Aaltonen      | Stakeholder Dynamics During the Project Front-End: The Case of Nuclear Waste Repository Projects                                      | 2015 | project stakeholder management |
|    |     | Jaakko Kujala       |                                                                                                                                       |      | stakeholder dynamics           |
|    |     | Laura Havela        |                                                                                                                                       |      | project front-end              |
|    |     | Grant Savage        |                                                                                                                                       |      | matrix                         |

|    |     |                   |                                                                                          |      |                                |
|----|-----|-------------------|------------------------------------------------------------------------------------------|------|--------------------------------|
|    |     |                   |                                                                                          |      | stakeholder salienceposition   |
|    |     |                   |                                                                                          |      | project success                |
| 31 | PMJ | Pernille Eskerod  | Stakeholder Inclusiveness: Enriching Project Management with General Stakeholder Theory  | 2015 | stakeholder inclusiveness      |
|    |     | Martina Huemann   |                                                                                          |      | managing stakeholders          |
|    |     | Claudia Ringhofer |                                                                                          |      | managing for stakeholders      |
|    |     |                   |                                                                                          |      | management for stakeholders    |
|    |     |                   |                                                                                          |      | management of stakeholders     |
|    |     |                   |                                                                                          |      | stakeholder theory             |
|    |     |                   |                                                                                          |      | case study                     |
|    |     |                   |                                                                                          |      | critical incidents technique   |
| 32 | PMJ | Sophie Hooge      | Breakthrough R&D Stakeholders: The Challenges of Legitimacy in Highly Uncertain Projects | 2015 | stakeholder management         |
|    |     | Cédric Dalmasso   |                                                                                          |      | legitimacy                     |
|    |     |                   |                                                                                          |      | resources allocation           |
|    |     |                   |                                                                                          |      | breakthrough R&D projects      |
| 33 | PMJ | Virpi Turkulainen | Managing Project Stakeholder Communication: The Qstock FestivalCase                      | 2015 | project stakeholder management |
|    |     | Kirsi Aaltonen    |                                                                                          |      | project communication          |
|    |     | Päivi Lohikoski   |                                                                                          |      | information-processing view    |
|    |     |                   |                                                                                          |      | stakeholder salience           |
|    |     | Nigel L. Williams |                                                                                          |      | project management             |

|    |     |                   |                                                                                                                    |      |                           |
|----|-----|-------------------|--------------------------------------------------------------------------------------------------------------------|------|---------------------------|
| 34 | PMJ | Nicole Ferdinand  | Online Stakeholder Interactions in the Early Stage of a Megaproject                                                | 2015 | mixed research            |
|    |     | Beverly Pasion    |                                                                                                                    |      | Social Network Analysis   |
|    |     |                   |                                                                                                                    |      | Twitter                   |
| 35 | PMJ | Alicia Medina     | What Are the Characteristics That Software Development Project Team Members Associate With a Good Project Manager? | 2015 | Project manager           |
|    |     | Alison J. Francis |                                                                                                                    |      | team members              |
|    |     |                   |                                                                                                                    |      | repertory grid            |
|    |     |                   |                                                                                                                    |      | project management skills |
| 36 | PMJ | Stuart Dillon     | Employing Grounded Theory to Uncover Behavioral Competencies of Information Technology Project Managers            | 2015 | grounded theory method    |
|    |     | Hazel Taylor      |                                                                                                                    |      | information technology    |
|    |     |                   |                                                                                                                    |      | project management        |
|    |     |                   |                                                                                                                    |      | behavioral competencies   |
| 37 | PMJ | Bob Dick          | Value Co-creation with Stakeholders Using Action Research as a Meta-methodology in a Funded Research Project       | 2015 | action research           |
|    |     | Shankar Sankaran  |                                                                                                                    |      | meta-methodology          |
|    |     | Kelly Shaw        |                                                                                                                    |      | project management        |
|    |     | Jacqueline Kelly, |                                                                                                                    |      | value co-creation         |

|    |     |                          |                                                                                                                                               |      |                             |
|----|-----|--------------------------|-----------------------------------------------------------------------------------------------------------------------------------------------|------|-----------------------------|
|    |     | Jeffrey Soar             | Project                                                                                                                                       |      |                             |
|    |     | Alan Davies              |                                                                                                                                               |      |                             |
|    |     | Annie Banbury            |                                                                                                                                               |      |                             |
| 38 | PMJ | Sinem Mollaoglu          | An Inquiry to Move an Underutilized Best Practice Forward: Barriers to Partnering in the Architecture, Engineering, and Construction Industry | 2015 | partnering                  |
|    |     | Anthony Sparkling        |                                                                                                                                               |      | delphi method               |
|    |     | Sean Thomas              |                                                                                                                                               |      | barriers                    |
|    |     |                          |                                                                                                                                               |      | trust                       |
|    |     |                          |                                                                                                                                               |      | cultural                    |
|    |     |                          |                                                                                                                                               |      | organizational project team |
| 39 | PMJ | Sihem Ben Mahmoud-Jouini | Contributions of Design Thinking to Project Management in an Innovation Context                                                               | 2016 | project management          |
|    |     | Christophe Midler        |                                                                                                                                               |      | innovation                  |
|    |     | Philippe Silberzahn      |                                                                                                                                               |      | design                      |
|    |     |                          |                                                                                                                                               |      | uncertainty                 |
|    |     |                          |                                                                                                                                               |      | design thinking             |

|    |      |                      |                                                                                                 |      |                                 |
|----|------|----------------------|-------------------------------------------------------------------------------------------------|------|---------------------------------|
| 40 | IJPM | Zou, Patrick X. W.   | Understanding the key risks in construction projects in China                                   | 2007 | Risk management                 |
|    |      | Zhang, Guomin        |                                                                                                 |      | Stakeholders                    |
|    |      | Wang, Jiayuan        |                                                                                                 |      | Life cycle                      |
|    |      |                      |                                                                                                 |      | Construction project management |
|    |      |                      |                                                                                                 |      | China                           |
| 41 | IJPM | Yaowu Wanga          | The application of electronic commerce and information integration in the construction industry | 2007 | Construction industry           |
|    |      | Jing Yanga           |                                                                                                 |      | Electronic commerce             |
|    |      | Qiping Shenb         |                                                                                                 |      | Application                     |
|    |      |                      |                                                                                                 |      | Information integration         |
| 42 | IJPM | Sergio Pellegrinelli | The importance of context in programme management: An empirical Reviews of programme practices  | 2007 | Programme management            |
|    |      | David Partington     |                                                                                                 |      | Context                         |
|    |      | Chris Hemingway      |                                                                                                 |      | Practices                       |
|    |      | Zaher Mohdzain       |                                                                                                 |      | MSP                             |

|    |      |                          |                                                                                                   |      |                                  |
|----|------|--------------------------|---------------------------------------------------------------------------------------------------|------|----------------------------------|
|    |      | Mahmood Shah             |                                                                                                   |      |                                  |
| 43 | IJPM | Petter S.                | Managing user expectations on software projects: Lessons from the trenches                        | 2008 | Managing projects                |
|    |      |                          |                                                                                                   |      | Managing stakeholders            |
| 44 | IJPM | Achterkamp, Marjolein C. | Investigating the use of the stakeholder notion in project management literature, a meta-analysis | 2008 | Stakeholders                     |
|    |      | Vos, Janita F. J.        |                                                                                                   |      | Managing Projects                |
| 45 | IJPM | Aaltonen, Kirsi          | Stakeholder salience in global projects                                                           | 2008 | Stakeholder management           |
|    |      | Jaakko, Kujala           |                                                                                                   |      | Global projects                  |
|    |      | Tuomas, Oijala           |                                                                                                   |      | Stakeholder salience             |
|    |      |                          |                                                                                                   |      | Stakeholder theory               |
|    |      |                          |                                                                                                   |      | Stakeholder influence strategies |
|    |      | van Wyk, Riaan           |                                                                                                   |      | Risk management                  |

|    |      |                         |                                                                                                             |      |                        |
|----|------|-------------------------|-------------------------------------------------------------------------------------------------------------|------|------------------------|
| 46 | IJPM | Bowen, Paul             | Project risk management practice: The case of a South African utility company                               | 2008 | Utility                |
|    |      | Akintoye, Akintola      |                                                                                                             |      | Case study             |
|    |      |                         |                                                                                                             |      | Stakeholder            |
|    |      |                         |                                                                                                             |      | Electricity            |
|    |      |                         |                                                                                                             |      | South Africa           |
| 47 | IJPM | Ipsilandis, Pandelis G. | A multicriteria satisfaction analysis approach in the assessment of operational programmes                  | 2008 | Managing programmes    |
|    |      | Samaras, George         |                                                                                                             |      | Programme appraisal    |
|    |      | Mplanas, Nikolaos       |                                                                                                             |      | Multicriteria analysis |
|    |      |                         |                                                                                                             |      | Decision making        |
| 48 | IJPM | Toor, Shamas-ur-Rehman  | Critical COMs of success in large-scale construction projects: Evidence from Thailand construction industry | 2008 | Critical COMs          |
|    |      | Ogunlana, Stephen O.    |                                                                                                             |      | Success factors        |
|    |      |                         |                                                                                                             |      | Large-scale projects   |

|    |      |                  |                                                   |      |                    |
|----|------|------------------|---------------------------------------------------|------|--------------------|
|    |      |                  |                                                   |      | Thailand           |
| 49 | IJPM | Artto, Karlos    | What is project strategy?                         | 2008 | Project strategy   |
|    |      | Kujala, Jaakko   |                                                   |      | Project business   |
|    |      | Dietrich, Perttu |                                                   |      | Project management |
|    |      | Martinsuo, Miia  |                                                   |      |                    |
| 50 | IJPM | Wei KeiWong      | A framework for trust in construction contracting | 2008 | System-based       |
|    |      | Tak WingYiu      |                                                   |      | Cognition-based    |
|    |      | Hoi YanPang      |                                                   |      | Affect-based       |



|    |      |                   |                                                                                            |      |                              |
|----|------|-------------------|--------------------------------------------------------------------------------------------|------|------------------------------|
|    |      |                   |                                                                                            |      | Structural equation modeling |
| 51 | IJPM | Lee, Margaret R.  | E-ethical leadership for virtual project teams                                             | 2009 | E-ethicst                    |
|    |      |                   |                                                                                            |      | E-leadership                 |
|    |      |                   |                                                                                            |      | Virtual project management   |
|    |      |                   |                                                                                            |      | Virtual teams                |
|    |      |                   |                                                                                            |      | Project management           |
|    |      |                   |                                                                                            |      | Ethics                       |
|    |      |                   |                                                                                            |      | Project leadership           |
|    |      |                   |                                                                                            |      | Ethical project leadership   |
|    |      |                   |                                                                                            |      | E-ethical project management |
|    |      |                   |                                                                                            |      | Sensitive material           |
|    |      |                   |                                                                                            |      | Code of conduct              |
|    |      |                   |                                                                                            |      | Social isolation             |
|    |      |                   |                                                                                            |      | Virtual community            |
|    |      |                   |                                                                                            |      | Stakeholder involvement      |
| 52 | IJPM | Jepsen, Anna Lund | Stakeholder analysis in projects: Challenges in using current guidelines in the real world | 2009 | Project management           |
|    |      | Eskerod, Pernille |                                                                                            |      | Stakeholder outline          |
|    |      |                   |                                                                                            |      | Commitment matrix            |
|    |      |                   |                                                                                            |      | Stakeholder analysis         |
|    |      | Bygstad, Bendik   |                                                                                            |      | Service innovation           |

|    |      |                     |                                                                                              |      |                                |
|----|------|---------------------|----------------------------------------------------------------------------------------------|------|--------------------------------|
| 53 | IJPM | Lanestedt, Gjermund | ICT based service innovation – A challenge for project management                            | 2009 | Stakeholders                   |
|    |      |                     |                                                                                              |      | Project models                 |
| 54 | IJPM | Aaltonen, K.        | Response strategies to stakeholder pressures in global projects                              | 2009 | Project stakeholder management |
|    |      | Sivonen, R          |                                                                                              |      | Stakeholder pressures          |
|    |      |                     |                                                                                              |      | Response strategies            |
|    |      |                     |                                                                                              |      | Global projects                |
| 55 | IJPM | Jin Wang            | Research on project selection system of pre-evaluation of engineering design project bidding | 2009 | Bidding project selection      |
|    |      | Yujie Xu            |                                                                                              |      | Engineering design project     |
|    |      | Zhun Li             |                                                                                              |      | Pre-evaluation                 |
|    |      |                     |                                                                                              |      | Index system                   |

|    |      |                       |                                                                                           |      |                                |
|----|------|-----------------------|-------------------------------------------------------------------------------------------|------|--------------------------------|
|    |      |                       |                                                                                           |      | Weighted Grey Target Decision  |
| 56 | IJPM | Carmen Joham          | Factors contributing to the success of equipment-intensive subcontractors in construction | 2009 | Conceptualization              |
|    |      | Mike Metcalfe         |                                                                                           |      | Connections                    |
|    |      | Saras Sastrowardoyo   |                                                                                           |      | Ideas                          |
|    |      |                       |                                                                                           |      | Interrogatives                 |
|    |      |                       |                                                                                           |      | Project management             |
|    |      |                       |                                                                                           |      | Pragmatism                     |
| 57 | IJPM | Francis T. Edum-Fotwe | A social ontology for appraising sustainability of construction projects and developments | 2009 | Sustainability                 |
|    |      | Andrew D. F. Price    |                                                                                           |      | Social issues                  |
|    |      |                       |                                                                                           |      | Construction                   |
|    |      |                       |                                                                                           |      | Project                        |
|    |      |                       |                                                                                           |      | Ontology                       |
| 58 | IJPM | Jeffrey K. Pintoa     | Trust in projects: An empirical assessment of owner/contractor relationships              | 2009 | Projects                       |
|    |      | Dennis P. Slevinb     |                                                                                           |      | Trust                          |
|    |      | Brent Englishc        |                                                                                           |      | Owner/contractor relationships |

|    |      |                                   |                                                                                                                       |      |                                |
|----|------|-----------------------------------|-----------------------------------------------------------------------------------------------------------------------|------|--------------------------------|
|    |      |                                   |                                                                                                                       |      | Construction                   |
| 59 | IJPM | P. Ballesteros Péreza             | Analysis of construction projects by means of value curves                                                            | 2010 | Project                        |
|    |      | M <sup>a</sup> .C. González-Cruzb |                                                                                                                       |      | Construction                   |
|    |      | J.P. Pastor-Ferrandob             |                                                                                                                       |      | Strategy canvas                |
|    |      |                                   |                                                                                                                       |      | Value curve                    |
|    |      |                                   |                                                                                                                       |      | Stakeholders                   |
| 60 | IJPM | Karelde Bakke                     | Does risk management contribute to IT project success? A meta-analysis of empirical evidence                          | 2010 | Managing risk                  |
|    |      | Albert Boonstra                   |                                                                                                                       |      | Project success                |
|    |      | Hans Wortmann                     |                                                                                                                       |      | Information Technology         |
| 61 | IJPM | Toor, Shamas-ur-Rehman            | Beyond the 'iron triangle': stakeholder perception of key performance indicators (KPIs) for large-scale public sector | 2010 | Project performance management |
|    |      | Ogunlana, Stephen O.              |                                                                                                                       |      | Large construction projects    |

|    |      |                       |                                                                                                         |      |                                   |
|----|------|-----------------------|---------------------------------------------------------------------------------------------------------|------|-----------------------------------|
| 61 | IJPM |                       | performance indicators (KPIs) for large-scale public sector development projects                        | 2010 | Key performance indicators (KPIs) |
|    |      |                       |                                                                                                         |      | Thai construction industry        |
| 62 | IJPM | Yang, Jing            | Stakeholder management in construction: An empirical study to address research gaps in previous studies | 2011 | Stakeholder management            |
|    |      | Shen, Geoffrey Qiping |                                                                                                         |      | Construction                      |
|    |      | Ho, Manfong           |                                                                                                         |      | Critical success factors          |
|    |      | Drew, Derek S.        |                                                                                                         |      | Framework                         |
|    |      | Xue, Xiaolong         |                                                                                                         |      | Social Network Analysis           |
| 63 | IJPM | Hemanta Kumar Doloi   | Understanding stakeholders' perspective of cost estimation in project management                        | 2011 | Cost overrun                      |
|    |      |                       |                                                                                                         |      | Stakeholders                      |
|    |      |                       |                                                                                                         |      | Soft system methodology           |

|    |      |                        |                                                                                                                         |      |                                      |
|----|------|------------------------|-------------------------------------------------------------------------------------------------------------------------|------|--------------------------------------|
|    |      |                        |                                                                                                                         |      | Project management                   |
| 64 | IJPM | Kirsi Aaltonen         | Project stakeholder analysis as an environmental interpretation process                                                 | 2011 | Project stakeholder analysis         |
|    |      |                        |                                                                                                                         |      | Environmental interpretation         |
|    |      |                        |                                                                                                                         |      | Project stakeholder environment      |
|    |      |                        |                                                                                                                         |      | International projects               |
| 65 | IJPM | Bernard Aritua         | What risks are common to or amplified in programmes:<br>Evidence from UK public sector infrastructure schemes           | 2011 | Multi-project environment            |
|    |      | Nigel J. Smith         |                                                                                                                         |      | Projects                             |
|    |      | Denise Bower           |                                                                                                                         |      | Programmes                           |
|    |      |                        |                                                                                                                         |      | Risk                                 |
|    |      |                        |                                                                                                                         |      | Procurement                          |
|    |      |                        |                                                                                                                         |      | Public sector                        |
| 66 | IJPM | Barbara Natalie Ungera | The three roles of a project portfolio management office:<br>Their impact on portfolio management execution and success | 2012 | Project management office            |
|    |      | Hans Georg Gemündena   |                                                                                                                         |      | Project portfolio management office  |
|    |      | Monique Aubryb         |                                                                                                                         |      | Project portfolio management quality |
|    |      |                        |                                                                                                                         |      | Project portfolio performance        |
|    |      |                        |                                                                                                                         |      | Project portfolio success            |

|    |      |                 |                                                                        |      |                                   |
|----|------|-----------------|------------------------------------------------------------------------|------|-----------------------------------|
|    |      |                 |                                                                        |      | Empirical study                   |
| 67 | IJPM | Karelde Bakker  | Risk managements' communicative effects influencing IT project success | 2012 | Risk management                   |
|    |      | Albert Boonstra |                                                                        |      | Project success                   |
|    |      | Hans Wortmann   |                                                                        |      | Communicative action              |
|    |      |                 |                                                                        |      | Case studies                      |
|    |      |                 |                                                                        |      | ERP                               |
| 68 | IJPM | Allen McKenna   | The linguistic turn in project conceptualization                       | 2013 | Pragmatism                        |
|    |      | Mike Metcalfe   |                                                                        |      | Complex project conceptualization |
|    |      |                 |                                                                        |      | Idea networking                   |
|    |      |                 |                                                                        |      | Stakeholders' concerns            |
|    |      | Claus Beringera |                                                                        |      | Project portfolio management      |

|    |      |                 |                                                                                                                                              |      |                            |
|----|------|-----------------|----------------------------------------------------------------------------------------------------------------------------------------------|------|----------------------------|
| 69 | IJPM | Daniel Jonasb   | Behavior of internal stakeholders in project portfolio management and its impact on success                                                  | 2013 | Stakeholder management     |
|    |      | Alexander Kockc |                                                                                                                                              |      | Stakeholder behavior       |
|    |      |                 |                                                                                                                                              |      | Project portfolio success  |
| 70 | IJPM | LiYaning Tang   | Factors affecting effectiveness and efficiency of analyzing stakeholders' needs at the briefing stage of public private partnership projects | 2013 | Critical factors           |
|    |      | Qiping Shen     |                                                                                                                                              |      | Briefing stage             |
|    |      |                 |                                                                                                                                              |      | Public private partnership |
|    |      |                 |                                                                                                                                              |      | Stakeholder                |



|    |      |                     |                                                                                                               |      |                         |
|----|------|---------------------|---------------------------------------------------------------------------------------------------------------|------|-------------------------|
|    |      |                     |                                                                                                               |      | Construction management |
|    |      |                     |                                                                                                               |      | Factor analysis         |
| 71 | IJPM | Artemis Changa      | Reconceptualising mega project success in Australian Defence: Recognising the importance of value co-creation | 2013 | Project success         |
|    |      | Ying-YiChihb        |                                                                                                               |      | Co-creation             |
|    |      | Eng Chew            |                                                                                                               |      | Value                   |
| 72 | IJPM | Mike Metcalfe       | Complex project conceptualisation and argument mapping                                                        | 2013 | Dialectic argument      |
|    |      | Saras Sastrowardoyo |                                                                                                               |      | Argument mapping        |
|    |      |                     |                                                                                                               |      | Australia               |

|    |      |                      |                                                                                                        |      |                                 |
|----|------|----------------------|--------------------------------------------------------------------------------------------------------|------|---------------------------------|
|    |      |                      |                                                                                                        |      | Narrative analysis              |
| 73 | IJPM | Virpi Havila         | Project-ending competence in premature project closures                                                | 2013 | Project-ending competence       |
|    |      | Christopher J.Medlin |                                                                                                        |      | Premature project closure       |
|    |      | Asta Salmi           |                                                                                                        |      | Termination phase               |
|    |      |                      |                                                                                                        |      | Car industry                    |
|    |      |                      |                                                                                                        |      | Aircraft manufacturing industry |
| 74 | IJPM | Feng Zhang           | Identification and evaluation of the key social competencies for Chinese construction project managers | 2013 | Social competencies             |
|    |      | Jian Zuo             |                                                                                                        |      | Structural models               |
|    |      | George Zillante      |                                                                                                        |      | Construction projects           |
|    |      |                      |                                                                                                        |      | Construction project managers   |
|    |      | Zeng, S. X.          |                                                                                                        |      | Major infrastructure projects   |
|    |      | Ma, H. Y.            |                                                                                                        |      | Social responsibility           |

|    |      |                       |                                                                                                                            |      |                            |
|----|------|-----------------------|----------------------------------------------------------------------------------------------------------------------------|------|----------------------------|
| 75 | IJPM | Lin,H.                | Social responsibility of major infrastructure projects in China                                                            | 2014 | Project life-cycle         |
|    |      | Zeng, R. C.           |                                                                                                                            |      | Stakeholders               |
|    |      | Tam, Vivian W. Y.     |                                                                                                                            |      |                            |
| 76 | IJPM | Mok, Ka Yan           | Stakeholder management studies in mega construction projects: A Reviews and future directions                              | 2014 | Stakeholder management     |
|    |      | Shen, Geoffrey Qiping |                                                                                                                            |      | Mega construction projects |
|    |      | Yang, Jing            |                                                                                                                            |      | Research Reviews           |
| 77 | IJPM | Purvis, Russell L.    | What's in it for me? Using expectancy theory and climate to explain stakeholder participation, its direction and intensity | 2014 | Project management         |
|    |      | Zagenczyk, Thomas J.  |                                                                                                                            |      | Stakeholder participation  |
|    |      | McCray,Gordon E.      |                                                                                                                            |      | Psychological climate      |
|    |      |                       |                                                                                                                            |      | Organizational climate     |
|    |      |                       |                                                                                                                            |      | Motivation                 |

|    |      |                      |                                                                                              |      |                               |
|----|------|----------------------|----------------------------------------------------------------------------------------------|------|-------------------------------|
|    |      |                      |                                                                                              |      | Expectancy theory             |
| 78 | IJPM | De Schepper, Steven  | Stakeholder dynamics and responsibilities in Public–Private Partnerships: A mixed experience | 2014 | Managing stakeholders         |
|    |      | Dooms, Michaél       |                                                                                              |      | PPP/PFI                       |
|    |      | Haezendonck, Elvira  |                                                                                              |      | Infrastructure                |
|    |      |                      |                                                                                              |      | Europe                        |
|    |      |                      |                                                                                              |      | Case study analysis           |
| 79 | IJPM | Rijke, Jeroen        | Adaptive programme management through a balanced performance/strategy oriented focus         | 2014 | Adaptive programme management |
|    |      | van Herk, Sebastiaan |                                                                                              |      | Alignment                     |
|    |      | Zevenbergen, Chris   |                                                                                              |      | Flood protection              |
|    |      | Ashley, Richard      |                                                                                              |      | Netherlands                   |
|    |      | Hertogh ,Marcel      |                                                                                              |      | Programme management          |
|    |      | ten Heuvelhof, Ernst |                                                                                              |      | Programme success             |

|    |      |                          |                                                                                                                             |      |                                 |
|----|------|--------------------------|-----------------------------------------------------------------------------------------------------------------------------|------|---------------------------------|
|    |      |                          |                                                                                                                             |      | Project management              |
|    |      |                          |                                                                                                                             |      | Room for the River              |
|    |      |                          |                                                                                                                             |      | Stakeholder engagement          |
| 80 | IJPM | Missonier, Stephanie     | Stakeholder analysis and engagement in projects: From stakeholder relational perspective to stakeholder relational ontology | 2014 | Managing stakeholder            |
|    |      | Loufrani-Fedida, Sabrina |                                                                                                                             |      | Actor–Network Theory (ANT)      |
|    |      |                          |                                                                                                                             |      | Relational ontology             |
|    |      |                          |                                                                                                                             |      | Information System (IS) project |
| 81 | IJPM | Mazur, Alicia            | Rating defence major project success: The role of personal attributes and stakeholder relationships                         | 2014 | Major project                   |
|    |      | Pisarski, Anne           |                                                                                                                             |      | Project manager                 |
|    |      | Chang, Artemis           |                                                                                                                             |      | Competence                      |
|    |      | Ashkanasy, Neal M.       |                                                                                                                             |      | Personal attributes             |

|    |      |                  |                                                                                                                 |      |                                       |
|----|------|------------------|-----------------------------------------------------------------------------------------------------------------|------|---------------------------------------|
|    |      |                  |                                                                                                                 |      | Project success                       |
|    |      |                  |                                                                                                                 |      | Stakeholders                          |
| 82 | IJPM | Rebecca JingYang | An investigation of stakeholder analysis in urban development projects: Empirical or rationalistic perspectives | 2014 | Stakeholder analysis                  |
|    |      |                  |                                                                                                                 |      | Urban development projects            |
|    |      |                  |                                                                                                                 |      | Empiricism                            |
|    |      |                  |                                                                                                                 |      | Rationalism                           |
| 83 | IJPM | Kate Davis       | Different stakeholder groups and their perceptions of project success                                           | 2014 | Project success and strategy          |
|    |      |                  |                                                                                                                 |      | Managing stakeholders                 |
|    |      |                  |                                                                                                                 |      | Project success factors               |
|    |      |                  |                                                                                                                 |      | Perception of project success factors |
|    |      |                  |                                                                                                                 |      | Multiple stakeholders                 |
|    |      | Feng Guo         |                                                                                                                 |      | Project governance                    |

|    |      |                        |                                                                                                                              |      |                                      |
|----|------|------------------------|------------------------------------------------------------------------------------------------------------------------------|------|--------------------------------------|
| 84 | IJPM | Yan Chang-Richards     | Effects of project governance structures on the management of risks in major infrastructure projects: A comparative analysis | 2014 | Risk management                      |
|    |      | Suzanne Wilkinson      |                                                                                                                              |      | Infrastructure construction projects |
|    |      | Ti Cun Li              |                                                                                                                              |      | Comparative case study               |
| 85 | IJPM | Hartono, Budi          | Project risk: Theoretical concepts and stakeholders' perspectives                                                            | 2014 | Project                              |
|    |      | Sulistyo, Sinta R.     |                                                                                                                              |      | Risk                                 |
|    |      | Praftiwi, Poetry P.    |                                                                                                                              |      | Concept                              |
|    |      | Hasmoro, Danar         |                                                                                                                              |      | Normative                            |
|    |      |                        |                                                                                                                              |      | Theory                               |
|    |      |                        |                                                                                                                              |      | Descriptive                          |
|    |      |                        |                                                                                                                              |      | Indonesia                            |
|    |      | Christopher Biesenthal |                                                                                                                              |      | Project management                   |

|    |      |                    |                                                                               |      |                              |
|----|------|--------------------|-------------------------------------------------------------------------------|------|------------------------------|
| 86 | IJPM | Ralf Wilden        | Multi-level project governance: Trends and opportunities                      | 2014 | Project governance           |
|    |      |                    |                                                                               |      | Leximancer                   |
|    |      |                    |                                                                               |      | Reviews                      |
|    |      |                    |                                                                               |      | Text mining                  |
| 87 | IJPM | Ralf Müller        | Operationalizing governance categories of projects                            | 2014 | Governance of projects       |
|    |      | Laurence Lecoeuvre |                                                                               |      | Modeling                     |
|    |      |                    |                                                                               |      | Categorization               |
| 88 | IJPM | Giorgio Locatelli  | Systems Engineering to improve the governance in complex project environments | 2014 | Systems Engineering          |
|    |      | Mauro Mancini      |                                                                               |      | Project governance           |
|    |      | Erika Romano       |                                                                               |      | Complex project environments |
|    |      |                    |                                                                               |      | Transforming governance      |



|    |      |                    |                                                                                                                               |      |                                      |
|----|------|--------------------|-------------------------------------------------------------------------------------------------------------------------------|------|--------------------------------------|
| 89 | IJPM | Erling S. Andersen | Value creation using the mission breakdown structure                                                                          | 2014 | Project success                      |
|    |      |                    |                                                                                                                               |      | Value creation                       |
|    |      |                    |                                                                                                                               |      | Mission breakdown structure          |
| 90 | IJPM | Gabriella Cserhádi | The relationship between success criteria and success factors in organisational event projects                                | 2014 | Success criteria and success factors |
|    |      | Lajos Szabó        |                                                                                                                               |      | Task and relationship orientation    |
|    |      |                    |                                                                                                                               |      | Organisational event projects        |
| 91 | IJPM | Alicia K. Mazur    | Major project managers' internal and external stakeholder relationships: The development and validation of measurement scales | 2015 | Stakeholder relationships            |
|    |      | Anne Pisarski      |                                                                                                                               |      | Project management                   |
|    |      |                    |                                                                                                                               |      | Scale development                    |
|    |      | Simon L.R.Vrhovec  |                                                                                                                               |      | Software project                     |

|    |      |                      |                                                                                                               |      |                               |
|----|------|----------------------|---------------------------------------------------------------------------------------------------------------|------|-------------------------------|
| 92 | IJPM | Tomaž Hovelja        | Diagnosing organizational risks in software projects:<br>Stakeholder resistance                               | 2015 | Stakeholder resistance        |
|    |      | Damjan Vavpotič      |                                                                                                               |      | Risk management               |
|    |      | Marjan Krisper       |                                                                                                               |      | Bank                          |
| 93 | IJPM | Amirhossein Heravi   | Evaluating the level of stakeholder involvement during the<br>project planning processes of building projects | 2015 | Stakeholder involvement       |
|    |      | Vaughan Coffey       |                                                                                                               |      | Planning process              |
|    |      | Bambang Trigunarsyah |                                                                                                               |      | Building projects             |
| 94 | IJPM | S.X. Zeng            | Social responsibility of major infrastructure projects in<br>China                                            | 2015 | Major infrastructure projects |
|    |      | H.Y.Ma               |                                                                                                               |      | Social responsibility         |
|    |      | H. Lin               |                                                                                                               |      | Project life-cycle            |
|    |      | R.C. Zeng            |                                                                                                               |      | Stakeholder                   |
|    |      | Vivian W.Y. Tam      |                                                                                                               |      |                               |

|    |      |                      |                                                                                                                            |      |                                   |
|----|------|----------------------|----------------------------------------------------------------------------------------------------------------------------|------|-----------------------------------|
| 95 | IJPM | Ka Yan Mok           | Stakeholder management studies in mega construction projects: A Reviews and future directions                              | 2015 | Stakeholder management            |
|    |      | Geoffrey Qiping Shen |                                                                                                                            |      | Mega construction projects        |
|    |      | JingYang             |                                                                                                                            |      | Research Reviews                  |
| 96 | IJPM | Russell L. Purvis    | What's in it for me? Using expectancy theory and climate to explain stakeholder participation, its direction and intensity | 2015 | Project management                |
|    |      | Thomas J. Zagenczyk  |                                                                                                                            |      | Stakeholder participation         |
|    |      | Gordon E. McCray     |                                                                                                                            |      | Psychological climate             |
|    |      |                      |                                                                                                                            |      | Organizational climate            |
|    |      |                      |                                                                                                                            |      | Motivation                        |
|    |      |                      |                                                                                                                            |      | Expectancy theory                 |
| 97 | IJPM | Allen McKenna        | Complex project conceptualization and the linguistic turn; the case of a small Australian construction company             | 2015 | Linguistic turn                   |
|    |      | Georges Baume        |                                                                                                                            |      | Complex project conceptualization |
|    |      |                      |                                                                                                                            |      | Pragmatism                        |
|    |      |                      |                                                                                                                            |      | Strategy                          |

|    |      |                   |                                                                                                                             |      |                            |
|----|------|-------------------|-----------------------------------------------------------------------------------------------------------------------------|------|----------------------------|
|    |      |                   |                                                                                                                             |      | Change projects            |
|    |      |                   |                                                                                                                             |      | Systems thinking           |
| 98 | IJPM | Jingyu Yu         | Exploring factors of preparing public engagement for large-scale development projects via a focus group study               | 2015 | Construction projects      |
|    |      | Mei-yung Leung    |                                                                                                                             |      | Focus group                |
|    |      |                   |                                                                                                                             |      | Preparation                |
|    |      |                   |                                                                                                                             |      | Public engagement          |
| 99 | IJPM | Annemiek Van Os   | Project risk as identity threat: explaining the development and consequences of risk discourse in an infrastructure project | 2015 | Risk                       |
|    |      | Freek Van Berkel  |                                                                                                                             |      | Project management         |
|    |      | Dick De Gilder    |                                                                                                                             |      | Identity threat            |
|    |      | Cathy Van Dyck    |                                                                                                                             |      | Discourse                  |
|    |      | Peter Groenewegen |                                                                                                                             |      | Cooperation                |
|    |      | Stefan Verweij    |                                                                                                                             |      | Public-private partnership |

|     |      |                |                                                                                                                                                                                      |      |                                                    |
|-----|------|----------------|--------------------------------------------------------------------------------------------------------------------------------------------------------------------------------------|------|----------------------------------------------------|
| 100 | IJPM |                | Achieving satisfaction when implementing PPP transportation infrastructure projects: a qualitative comparative analysis of the A15 highway DBFM project                              | 2015 | Transportation infrastructure project              |
|     |      |                |                                                                                                                                                                                      |      | DBFM                                               |
|     |      |                |                                                                                                                                                                                      |      | Project implementation                             |
|     |      |                |                                                                                                                                                                                      |      | Project management                                 |
|     |      |                |                                                                                                                                                                                      |      | mvQCA                                              |
| 101 | IJPM | Stefan Verweij | Producing satisfactory outcomes in the implementation phase of PPP infrastructure projects: A fuzzy set qualitative comparative analysis of 27 road constructions in the Netherlands | 2015 | Fuzzy set qualitative comparative analysis (fsQCA) |
|     |      |                |                                                                                                                                                                                      |      | Management                                         |
|     |      |                |                                                                                                                                                                                      |      | Public–private cooperation                         |
|     |      |                |                                                                                                                                                                                      |      | Public–private partnership (PPP)                   |
|     |      |                |                                                                                                                                                                                      |      | Satisfaction                                       |
|     |      |                |                                                                                                                                                                                      |      | Transportation infrastructure project              |
| 102 | IJPM | Qian Shi       | On the management of social risks of hydraulic infrastructure projects in China: A case study                                                                                        | 2015 | Social risk                                        |
|     |      | Yang Liu       |                                                                                                                                                                                      |      | Infrastructure project                             |
|     |      | Jian Zuo       |                                                                                                                                                                                      |      | China                                              |

|     |      |                  |                                                                     |      |                                |
|-----|------|------------------|---------------------------------------------------------------------|------|--------------------------------|
|     |      | Ningxia Pan      |                                                                     |      | Case study                     |
|     |      | Guofeng Ma       |                                                                     |      |                                |
| 103 | IJPM | Kirsi Aaltonen   | Towards an improved understanding of project stakeholder landscapes | 2016 | Project stakeholder landscapes |
|     |      | Jaakko Kujala    |                                                                     |      | Stakeholder management         |
|     |      |                  |                                                                     |      | Stakeholder theory             |
|     |      |                  |                                                                     |      | Complexity                     |
|     |      |                  |                                                                     |      | Uncertainty                    |
|     |      |                  |                                                                     |      | Dynamism                       |
|     |      |                  |                                                                     |      | Institutional context          |
| 104 | IJPM | Aurangzeab Butt  | Project change stakeholder communication                            | 2016 | Project management             |
|     |      | Marja Naaranoja  |                                                                     |      | Change management              |
|     |      | Jussi Savolainen |                                                                     |      | Communication management       |
|     |      |                  |                                                                     |      | Stakeholders                   |
|     |      |                  |                                                                     |      | Action research                |
|     |      |                  |                                                                     |      | Project culture                |
|     |      |                  |                                                                     |      | Stakeholder know-how           |
|     |      | Xian Zheng       |                                                                     |      | Social network analysis        |
|     |      | Yun Le           |                                                                     |      | Stakeholder theory             |

|     |      |                            |                                                                                                                  |      |                                 |
|-----|------|----------------------------|------------------------------------------------------------------------------------------------------------------|------|---------------------------------|
| 105 | IJPM | Albert P.C. Chan           | Reviews of the application of social network analysis (SNA) in construction project management research          | 2016 | Construction project management |
|     |      | Yi Hu                      |                                                                                                                  |      | Reviews                         |
|     |      | Yongkui Li                 |                                                                                                                  |      |                                 |
| 106 | IJPM | Eefje Cuppen               | Stakeholder engagement in large-scale energy infrastructure projects: Revealing perspectives using Q methodology | 2016 | Stakeholder engagement          |
|     |      | Marian G.C. Bosch-Rekvelde |                                                                                                                  |      | Q methodology                   |
|     |      | Ewout Pikaar               |                                                                                                                  |      | Risk governance                 |
|     |      | Donna C. Mehos             |                                                                                                                  |      | Stakeholder analysis            |
|     |      |                            |                                                                                                                  |      | Public engagement               |
| 107 | IJPM | Kate Davis                 | A method to measure success dimensions relating to individual stakeholder groups                                 | 2016 | Project success                 |
|     |      |                            |                                                                                                                  |      | Managing stakeholders           |
|     |      |                            |                                                                                                                  |      | Perception of project success   |
|     |      |                            |                                                                                                                  |      | Multiple stakeholders           |
|     |      |                            |                                                                                                                  |      | Measuring project success       |
|     |      | Lei Du                     |                                                                                                                  |      | Engineer–procure–construct      |

|     |      |                              |                                                                                                                                                  |      |                           |
|-----|------|------------------------------|--------------------------------------------------------------------------------------------------------------------------------------------------|------|---------------------------|
| 108 | IJPM | Wenzhe Tang                  | Enhancing engineer–procure–construct project performance by partnering in international markets: Perspective from Chinese construction companies | 2016 | Partnership               |
|     |      | Chunna Liua                  |                                                                                                                                                  |      | Risk management           |
|     |      | Shuli Wanga                  |                                                                                                                                                  |      | Organizational capability |
|     |      | Tengfei Wanga                |                                                                                                                                                  |      | Project performance       |
|     |      | Wenxin Shena                 |                                                                                                                                                  |      | Construction              |
|     |      | Min Huangb                   |                                                                                                                                                  |      | China                     |
|     |      | Yongzhi Zhoub                |                                                                                                                                                  |      |                           |
| 109 | IJPM | Rebecca J. Yang              | Modelling stakeholder-associated risk networks in green building projects                                                                        | 2016 | Green building project    |
|     |      | Patrick X.W. Zou             |                                                                                                                                                  |      | Risk                      |
|     |      | Jiayuan Wang                 |                                                                                                                                                  |      | Stakeholder               |
|     |      |                              |                                                                                                                                                  |      | Social network analysis   |
|     |      | Marjolein A.G. van Offenbeek |                                                                                                                                                  |      | Issue management          |



|     |      |                      |                                                                                                   |      |                                 |
|-----|------|----------------------|---------------------------------------------------------------------------------------------------|------|---------------------------------|
| 110 | IJPM | Janita F.J.Vos       | An integrative framework for managing project issues across stakeholder groups                    | 2016 | Issue–stakeholder connection    |
|     |      |                      |                                                                                                   |      | Knowledge transformation        |
|     |      |                      |                                                                                                   |      | Project management              |
|     |      |                      |                                                                                                   |      | Stakeholder management          |
| 111 | IJPM | Robert Joslin        | How safety leadership works among owners, contractors and subcontractors in construction projects | 2016 | Project governance              |
|     |      | Ralf Müller          |                                                                                                   |      | Project success                 |
|     |      |                      |                                                                                                   |      | Agency theory                   |
|     |      |                      |                                                                                                   |      | Stewardship theory              |
| 112 | IJPM | Bronte van der Hoorn | The Project-space Model: Visualising the enablers and constraints for a given project             | 2016 | Managing projects               |
|     |      |                      |                                                                                                   |      | Critical success factors        |
|     |      |                      |                                                                                                   |      | Tailoring of project management |

|     |      |                     |                                                                                                                                    |      |                                 |
|-----|------|---------------------|------------------------------------------------------------------------------------------------------------------------------------|------|---------------------------------|
| 113 | IJPM | Karlos Artto        | From the front end of projects to the back end of operations: Managing projects for value creation throughout the system lifecycle | 2016 | Management of projects          |
|     |      | Tuomas Ahola        |                                                                                                                                    |      | Value creation                  |
|     |      | Valtteri Vartiainen |                                                                                                                                    |      | System lifecycle                |
|     |      |                     |                                                                                                                                    |      | Project phase                   |
|     |      |                     |                                                                                                                                    |      | Operations phase                |
|     |      |                     |                                                                                                                                    |      | Integration                     |
| 114 | AMR  | Jones, Thomas M.    | Ethical Theory and Stakeholder-Related Decisions: The Role of Stakeholder Culture                                                  | 2007 | Stakeholders                    |
|     |      | Felps, Will         |                                                                                                                                    |      | Capitalists & financiers        |
|     |      | Bigley, Gregory A.  |                                                                                                                                    |      | Constituents (persons)          |
|     |      |                     |                                                                                                                                    |      | Management                      |
|     |      |                     |                                                                                                                                    |      | Organizational sociology        |
|     |      |                     |                                                                                                                                    |      | Ethical Theory                  |
|     |      |                     |                                                                                                                                    |      | Agency theory                   |
|     |      |                     |                                                                                                                                    |      | Philanthropists                 |
| 115 | AMR  | Barnett, Michael L. | Stakeholder Influence Capacity and the Variability of                                                                              | 2007 | corporate social responsibility |
|     |      |                     |                                                                                                                                    |      | corporate social performance    |
|     |      |                     |                                                                                                                                    |      | corporate financial performance |
|     |      |                     |                                                                                                                                    |      | stakeholder influence capacity  |
|     |      |                     |                                                                                                                                    |      | stakeholder theory              |
|     |      |                     |                                                                                                                                    |      | Business structures             |

|     |     |                       |                                                                                                             |      |                                               |
|-----|-----|-----------------------|-------------------------------------------------------------------------------------------------------------|------|-----------------------------------------------|
| 115 | AMR |                       | Financial Returns to Corporate Social Responsibility                                                        | 2007 | Investment strategies                         |
|     |     |                       |                                                                                                             |      | Financial investments                         |
|     |     |                       |                                                                                                             |      | Social welfare                                |
|     |     |                       |                                                                                                             |      | Industrial management                         |
|     |     |                       |                                                                                                             |      | Corporate reputation                          |
|     |     |                       |                                                                                                             |      | Environmental management                      |
| 116 | AMR | Andrew King           | Cooperation between corporations and environmental groups: A transaction cost perspective                   | 2007 | Alliances                                     |
|     |     |                       |                                                                                                             |      | Collaboration                                 |
|     |     |                       |                                                                                                             |      | Environmental management                      |
|     |     |                       |                                                                                                             |      | Corporations                                  |
|     |     |                       |                                                                                                             |      | Green businesses                              |
|     |     |                       |                                                                                                             |      | Nonprofit organizations                       |
|     |     |                       |                                                                                                             |      | Industrial management                         |
|     |     |                       |                                                                                                             |      | Business structures                           |
|     |     |                       |                                                                                                             |      | Business executives                           |
|     |     |                       |                                                                                                             |      | International alliances                       |
| 117 | AMR | Shelley L. Brickson   | Organizational identity orientation: The genesis of the role of the firm and distinct forms of social value | 2007 | Organizational identity                       |
|     |     |                       |                                                                                                             |      | Nonprofit organizations                       |
|     |     |                       |                                                                                                             |      | Social psychology                             |
|     |     |                       |                                                                                                             |      | Business structures                           |
|     |     |                       |                                                                                                             |      | Self interest                                 |
|     |     |                       |                                                                                                             |      | Motivation                                    |
|     |     |                       |                                                                                                             |      | Corporations -- Investor relations            |
|     |     |                       |                                                                                                             |      | Capitalist & financiers                       |
|     |     |                       |                                                                                                             |      | Social values -- Research                     |
|     |     |                       |                                                                                                             |      | Stakeholders                                  |
|     |     |                       |                                                                                                             |      | Work environment -- Research                  |
|     |     |                       |                                                                                                             |      | work -- Sociological aspects                  |
|     |     |                       |                                                                                                             |      | Corporate culture                             |
|     |     |                       |                                                                                                             |      | Industries -- Social aspects                  |
|     |     |                       |                                                                                                             |      | Business enterprises -- Officials & employees |
|     |     |                       |                                                                                                             |      | Quality of work life                          |
|     |     | Michael D. Pfarrer    |                                                                                                             |      | Transgression                                 |
|     |     | Katherine A. Decelles |                                                                                                             |      | Saliency                                      |
|     |     | Ken G. Smith          |                                                                                                             |      | Business ethics                               |

|     |     |                    |                                                                                    |      |                                        |
|-----|-----|--------------------|------------------------------------------------------------------------------------|------|----------------------------------------|
| 118 | AMR | M. Susan Taylor    | After the Fall: Reintegrating the Corrupt Organization                             | 2008 | Public relations                       |
|     |     |                    |                                                                                    |      | Ethical behavior                       |
|     |     |                    |                                                                                    |      | Social ethics                          |
|     |     |                    |                                                                                    |      | Penance                                |
|     |     |                    |                                                                                    |      | Industrial management                  |
|     |     |                    |                                                                                    |      | Propriety                              |
|     |     |                    |                                                                                    |      | Business management                    |
|     |     |                    |                                                                                    |      |                                        |
| 119 | AMR | Ilze Kivleniece    | Creating and Capturing Value in Public-Private Ties: A Private Actor's Perspective | 2012 | Business-government relations          |
|     |     | Bertrand V. Quelin |                                                                                    |      | Corporate Political Strategy/Action    |
|     |     |                    |                                                                                    |      | Organizational Design                  |
|     |     |                    |                                                                                    |      | Organizational/Institutional Economics |
|     |     |                    |                                                                                    |      | Performance                            |
|     |     |                    |                                                                                    |      | Public Policy                          |
| 120 | AMR | Donald Lange       | Understanding Attributions of Corporate Social Irresponsibility                    | 2012 | Corporate Social Responsibility        |
|     |     | Nathan T. Washburn |                                                                                    |      | Attribution Theory                     |
|     |     |                    |                                                                                    |      | Perceptual Issues                      |

|     |     |                      |                                                                                                              |      |                                    |
|-----|-----|----------------------|--------------------------------------------------------------------------------------------------------------|------|------------------------------------|
| 121 | AMR | Jonathan Bundy       | Strategic Cognition and Issue Salience: Toward an Explanation of Firm Responsiveness to Stakeholder Concerns | 2013 | Stakeholder management             |
|     |     | Christine Shropshire |                                                                                                              |      | Organizational identity            |
|     |     | Ann K. Buchholtz     |                                                                                                              |      | Stakeholder salience               |
| 122 | AMR | Daniel Korschun      | Boundary-Spanning Employees and Relationships with External Stakeholders: A Social Identity Approach         | 2015 | Social identity theory             |
|     |     |                      |                                                                                                              |      | Stakeholder Theory                 |
|     |     |                      |                                                                                                              |      | Employee-Stakeholder Relationships |
|     |     |                      |                                                                                                              |      | External stakeholder               |
|     |     |                      |                                                                                                              |      | Organizational identity            |
|     |     | Flore Bridoux        |                                                                                                              |      | Social Welfare                     |
|     |     | J. W. Stoelhorst     |                                                                                                              |      | Stakeholder relationships          |
|     |     |                      |                                                                                                              |      | Value Creation                     |

|     |     |                  |                                                                                                                                    |      |                                 |
|-----|-----|------------------|------------------------------------------------------------------------------------------------------------------------------------|------|---------------------------------|
| 123 | AMR |                  | Stakeholder Relationships and Social Welfare: A Behavioral Theory of Contributions to Joint Value Creation                         | 2016 | Instrumental stakeholder theory |
|     |     |                  |                                                                                                                                    |      | Relational models theory        |
|     |     |                  |                                                                                                                                    |      | Team production                 |
|     |     |                  |                                                                                                                                    |      | Microfoundations                |
|     |     |                  |                                                                                                                                    |      | Social value orientation        |
| 124 | AMR | Scott Sonenshein | How Corporations Overcome Issue Illegitimacy and Issue Equivocality to Address Social Welfare: The Role of the Social Change Agent | 2016 | Social issues                   |
|     |     |                  |                                                                                                                                    |      | Social change agent             |
|     |     |                  |                                                                                                                                    |      | Influence                       |
|     |     |                  |                                                                                                                                    |      | Stakeholder theory              |
|     |     |                  |                                                                                                                                    |      | Corporate social responsibility |
| 125 | AMR | J. Adam Cobb     | How Firms Shape Income Inequality: Stakeholder Power, Executive Decision Making, and the Structuring of Employment Relationships   | 2016 | income inequality               |
|     |     |                  |                                                                                                                                    |      | employment relationship         |
|     |     |                  |                                                                                                                                    |      | internal labor markets          |
|     |     |                  |                                                                                                                                    |      | wage setting                    |
|     |     |                  |                                                                                                                                    |      | job matching                    |

|     |     |                 |                                                                                     |      |                                 |
|-----|-----|-----------------|-------------------------------------------------------------------------------------|------|---------------------------------|
|     |     |                 |                                                                                     |      | firm boundaries                 |
|     |     |                 |                                                                                     |      | corporate governance            |
|     |     |                 |                                                                                     |      | executive compensation          |
| 126 | AMR | Sébastien Mena  | On the Forgetting of Corporate Irresponsibility                                     | 2016 | corporate irresponsibility      |
|     |     | Jukka Rintamäki |                                                                                     |      | collective memory               |
|     |     | Peter Fleming   |                                                                                     |      | forgetting                      |
|     |     | André Spicer    |                                                                                     |      | forgetting work                 |
|     |     |                 |                                                                                     |      | organizational memory           |
|     |     |                 |                                                                                     |      | social memory studies           |
| 127 | CHB | Gilad Ravid     | Wikibooks in higher education: Empowerment through online distributed collaboration | 2008 | E-book                          |
|     |     | Yoram M Kalman  |                                                                                     |      | Wiki                            |
|     |     | Sheizaf Rafaeli |                                                                                     |      | Empowerment                     |
|     |     |                 |                                                                                     |      | Education                       |
|     |     |                 |                                                                                     |      | Computer-mediated communication |
|     |     | Melinda Korzaan |                                                                                     |      | Project escalation              |

|     |     |                     |                                                                                                                |      |                            |
|-----|-----|---------------------|----------------------------------------------------------------------------------------------------------------|------|----------------------------|
| 128 | CHB | Steven A. Morris    | Individual characteristics and the intention to continue project escalation                                    | 2009 | Implementation Mindset     |
|     |     |                     |                                                                                                                |      | Locus of Control           |
|     |     |                     |                                                                                                                |      | Preference for Consistency |
| 129 | CHB | Stouten, H.         | Learning from playing with microworlds in policy making:<br>An experimental evaluation in fisheries management | 2012 | Microworld                 |
|     |     | Heene, A.           |                                                                                                                |      | Learning                   |
|     |     | Gellynck, X.        |                                                                                                                |      | Stakeholders               |
|     |     | Polet, H.           |                                                                                                                |      | Experiment                 |
|     |     |                     |                                                                                                                |      | Belgian fisheries          |
|     |     | Nienke D. Van Norel |                                                                                                                |      | Twitter                    |



|     |     |                      |                                                                                                     |      |                                           |
|-----|-----|----------------------|-----------------------------------------------------------------------------------------------------|------|-------------------------------------------|
| 130 | CHB | Piet A.M. Kommers    | Damaged corporate reputation: Can celebrity Tweets repair it?                                       | 2014 | Tweet Impact                              |
|     |     | Joris J. Van Hoof    |                                                                                                     |      | Tweet Design                              |
|     |     | Joost W.M. Verhoeven |                                                                                                     |      | Corporate Reputation                      |
|     |     |                      |                                                                                                     |      | Celebrity Tweets                          |
| 131 | CHB | Michael A. Horning   | A scenario-based approach for projecting user requirements for wireless proximal community networks | 2014 | Scenario-based design                     |
|     |     | Harold R. Robinson   |                                                                                                     |      | Wireless communications                   |
|     |     | John M. Carroll      |                                                                                                     |      | Mobile devices                            |
|     |     |                      |                                                                                                     |      | Wi-Fi Networks                            |
|     |     |                      |                                                                                                     |      | Proximate community networks              |
|     |     |                      |                                                                                                     |      | Sense of community                        |
|     |     | Eyun-Jung Ki         |                                                                                                     |      | Organization sustainability communication |

|     |     |                                                                                                             |                                                                                                                                       |      |                                                                                                                                                                                    |
|-----|-----|-------------------------------------------------------------------------------------------------------------|---------------------------------------------------------------------------------------------------------------------------------------|------|------------------------------------------------------------------------------------------------------------------------------------------------------------------------------------|
| 132 | CHB | <div>Sumin Shin</div> <div></div> <div></div>                                                               | Organization sustainability communication (OSC):<br>Similarities and differences of OSC messages in the United States and South Korea | 2015 | <div>Green movement</div> <div>Corporate websites</div> <div>Cross-culture</div>                                                                                                   |
| 133 | CHB | <div>Berk Kucukaltan</div> <div>Zahir Irani</div> <div>Emel Aktas</div> <div></div> <div></div> <div></div> | A decision support model for identification and prioritization of key performance indicators in the logistics industry                | 2016 | <div>Logistics performance indicators</div> <div>Balanced scorecard</div> <div>ANP</div> <div>Multi-criteria decision making</div> <div>Stakeholders</div> <div>Social media</div> |
| 134 | CHB | <div>Mina Roshana</div> <div>Matthew Warrena</div>                                                          | Understanding the use of social media by organisations for                                                                            | 2016 | <div>Social media</div> <div>Crisis management</div>                                                                                                                               |

|     |     |                        |                                                                                                                                                                            |      |                              |
|-----|-----|------------------------|----------------------------------------------------------------------------------------------------------------------------------------------------------------------------|------|------------------------------|
| 134 | CHB | Rodney Carr            | crisis communication                                                                                                                                                       | 2010 | Crisis communication         |
|     |     |                        |                                                                                                                                                                            |      | Crisis response strategy     |
| 135 | CHB | Leah M. Omilion-Hodges | University use of social media and the crisis lifecycle:<br>Organizational messages, first information responders' reactions, reframed messages and dissemination patterns | 2016 | Organizational crisis        |
|     |     | Katie L. McClain       |                                                                                                                                                                            |      | Stakeholders                 |
|     |     |                        |                                                                                                                                                                            |      | Channel specification theory |
|     |     |                        |                                                                                                                                                                            |      | Framing                      |
|     |     | Dalia Susnienė         |                                                                                                                                                                            |      | stakeholder satisfaction     |

|     |    |                  |                                                             |      |                                        |
|-----|----|------------------|-------------------------------------------------------------|------|----------------------------------------|
| 136 | EE | Povilas Vanagas  | Means for Satisfaction of Stakeholders' Needs and Interests | 2007 | harmonization of stakeholder interests |
|     |    |                  |                                                             |      | stakeholder analysis                   |
|     |    |                  |                                                             |      | organization's competitiveness         |
| 137 | EE | Lidija Kašubienė | Assumptions of E-government Services Quality Evaluation     | 2007 | e-government                           |
|     |    | Povilas Vanagas  |                                                             |      | system quality                         |

|     |    |                  |                                                                                       |      |                                       |
|-----|----|------------------|---------------------------------------------------------------------------------------|------|---------------------------------------|
| 137 | EE |                  | Assumptions of E-government Services Quality Evaluation                               | 2007 | e-government services quality         |
|     |    |                  |                                                                                       |      | process quality                       |
| 138 | EE | Povilas Vanagas  | Development of Total Quality Management in Kaunas University of Technology            | 2008 | total quality management              |
|     |    | Mantas Vilkas    |                                                                                       |      | quality culture                       |
|     |    |                  |                                                                                       |      | quality and performance measurement   |
|     |    |                  |                                                                                       |      | stakeholders' interests harmonization |
|     |    |                  |                                                                                       |      | processual approach                   |
|     |    |                  |                                                                                       |      | quality of life                       |
|     |    |                  |                                                                                       |      | wage administration under TQM         |
| 139 | EE | Vytautas Juščius | Influence of Corporate Social Responsibility on Competitive Abilities of Corporations | 2008 | corporate social responsibility (CSR) |
|     |    | Vytautas Snieška |                                                                                       |      | competitive advantage                 |

|     |    |                     |                                                                                            |      |                                  |
|-----|----|---------------------|--------------------------------------------------------------------------------------------|------|----------------------------------|
|     |    |                     |                                                                                            |      | stakeholder                      |
| 140 | EE | Ingrida Smaiziene   | Corporate Reputation: Multidisciplinary Richness and Search for a Relevant Definition      | 2009 | corporate reputation             |
|     |    | Robertas Jucevicius |                                                                                            |      | Corporate image                  |
| 141 | EE | Dalia Susniene      | Prerequisites of Stakeholder Management in an Organization                                 | 2009 | stakeholder relationships        |
|     |    | Gediminas Sargunas  |                                                                                            |      | organization competitiveness     |
|     |    |                     |                                                                                            |      | organization's wealth            |
|     |    |                     |                                                                                            |      | intangible assets                |
|     |    |                     |                                                                                            |      | balanced scorecard               |
| 142 | EE | Jurate Banyte       | Expression of Green Marketing Developing the Conception of Corporate Social Responsibility | 2010 | green marketing                  |
|     |    | Lina Brazioniene    |                                                                                            |      | corporate social responsibility  |
|     |    | Agne Gadeikiene     |                                                                                            |      | green consumer                   |
|     |    |                     |                                                                                            |      | Lithuanian market of ecofriendly |

|     |    |                           |                                                                      |      |                                 |
|-----|----|---------------------------|----------------------------------------------------------------------|------|---------------------------------|
|     |    |                           |                                                                      |      | food products                   |
| 143 | EE | Asta Valackiene           | Implementing Balanced Corporate Social Responsibility                | 2011 | corporate social responsibility |
|     |    | Diana Miceviciene         |                                                                      |      | stakeholder analysis            |
|     |    |                           |                                                                      |      | social-environment reference    |
|     |    |                           |                                                                      |      | orientation                     |
| 144 | EE | Edverdas Vaclovas Bartkus | Business Sustainability Assessment: Comparing Results of Two Studies | 2011 | business sustainability         |
|     |    | Rokas Grunda              |                                                                      |      | sustainability assessment       |
|     |    |                           |                                                                      |      | corporate sustainability        |
|     |    |                           |                                                                      |      | sustainability evaluation       |
|     |    |                           |                                                                      |      | sustainable development         |
|     |    |                           |                                                                      |      | annual statements               |
|     |    |                           |                                                                      |      | availability                    |
|     |    | Antoni Segui-Alcaraz      |                                                                      |      | banks                           |
|     |    |                           |                                                                      |      | taxonomy                        |

|     |    |                       |                                                                                                    |      |                                 |
|-----|----|-----------------------|----------------------------------------------------------------------------------------------------|------|---------------------------------|
| 145 | EE |                       | Development of a Classification of Spanish Credit Institutions Based on the Concept of Stakeholder | 2012 | employees                       |
|     |    |                       |                                                                                                    |      | society                         |
|     |    |                       |                                                                                                    |      | legislation                     |
| 146 | EE | Karolina Petrokaitė   | Corporate Reputation Management Decisions: Customer's Perspective                                  | 2013 | corporate reputation            |
|     |    | Jurgita Stravinskienė |                                                                                                    |      | corporate reputation management |
|     |    |                       |                                                                                                    |      | stakeholder groups              |
|     |    |                       |                                                                                                    |      | consumer perspective            |
|     |    |                       |                                                                                                    |      | communication                   |
|     |    |                       |                                                                                                    |      |                                 |



|     |    |               |                                                                          |      |                     |
|-----|----|---------------|--------------------------------------------------------------------------|------|---------------------|
| 147 | EE | Alok Mishra   | Applications of Stakeholder Theory in Information Systems and Technology | 2013 | stakeholder theory  |
|     |    | Deepti Mishra |                                                                          |      | stakeholder model   |
|     |    |               |                                                                          |      | stakeholder         |
|     |    |               |                                                                          |      | information systems |
|     |    |               |                                                                          |      | management          |

|     |    |                    |                                                                                                       |      |                                 |
|-----|----|--------------------|-------------------------------------------------------------------------------------------------------|------|---------------------------------|
| 148 | EE | Vytautas Juscius   | Integration of CSR into Value Creation Chain: Conceptual Framework                                    | 2013 | corporate social responsibility |
|     |    | Donatas Jonikas    |                                                                                                       |      | value creation chain            |
|     |    |                    |                                                                                                       |      | shared value                    |
| 149 | EE | Lina Dagiliene     | Increasing Business Transparency by Corporate Social Reporting: Development and Problems in Lithuania | 2014 | business transparency           |
|     |    | Sviesa Leitoniene  |                                                                                                       |      | corporate social reporting      |
|     |    | Adriana Grencikova |                                                                                                       |      | social responsibility           |

|     |    |                       |                                                                                                           |      |                                                    |
|-----|----|-----------------------|-----------------------------------------------------------------------------------------------------------|------|----------------------------------------------------|
|     |    |                       |                                                                                                           |      | stakeholders                                       |
|     |    |                       |                                                                                                           |      | social accounting                                  |
| 150 | EE | Migle Matuleviciene   | The Importance of Stakeholders for Corporate Reputation                                                   | 2015 | stakeholders                                       |
|     |    | Jurgita Stravinskiene |                                                                                                           |      | stakeholder importance                             |
|     |    |                       |                                                                                                           |      | corporate reputation                               |
|     |    |                       |                                                                                                           |      | Relationship between organization and stakeholders |
|     |    |                       |                                                                                                           |      | Corporate reputatiostakeholders                    |
| 151 | EE | Patrycja Habek        | Factors Influencing the Development of CSR Reporting Practices: Experts' versus Preparers' Points of View | 2015 | Corporate Social Responsibility Reporting          |
|     |    | Radosław Wolniak      |                                                                                                           |      | Sustainability Reporting                           |
|     |    |                       |                                                                                                           |      | Determinants                                       |

|     |      |                       |                                                                                             |      |                                    |
|-----|------|-----------------------|---------------------------------------------------------------------------------------------|------|------------------------------------|
|     |      |                       |                                                                                             |      | Drivers And Barriers               |
|     |      |                       |                                                                                             |      | Public Sector Role                 |
| 152 | EE   | Migle Matuleviciene   | How to Develop Key Stakeholders Trust in Terms of Corporate Reputation                      | 2016 | Trust                              |
|     |      | Jurgita Stravinskiene |                                                                                             |      | Development of Trust               |
|     |      |                       |                                                                                             |      | Corporate Reputation               |
|     |      |                       |                                                                                             |      | Key Stakeholders                   |
|     |      |                       |                                                                                             |      | Organization                       |
| 153 | IEEE | Gil, N.               | Design Reuse and Buffers in High-Tech Infrastructure Development: A Stakeholder Perspective | 2007 | Design buffers                     |
|     |      | Beckman, S.           |                                                                                             |      | design reuse                       |
|     |      |                       |                                                                                             |      | infrastructure development process |
|     |      |                       |                                                                                             |      | project stakeholder management     |
|     |      | Cathy A. Rusinko      |                                                                                             |      | Carpet industry                    |

|     |      |                           |                                                                                                                                    |      |                                 |
|-----|------|---------------------------|------------------------------------------------------------------------------------------------------------------------------------|------|---------------------------------|
| 154 | IEEE |                           | Green Manufacturing: An Evaluation of Environmentally Sustainable Manufacturing Practices and Their Impact on Competitive Outcomes | 2007 | environmental sustainability    |
|     |      |                           |                                                                                                                                    |      | green manufacturing             |
|     |      |                           |                                                                                                                                    |      | manufacturing competitiveness   |
|     |      |                           |                                                                                                                                    |      | pollution prevention            |
| 155 | IEEE | Ravi Patnayakuni          | Systems Development Process Improvement: A Knowledge Integration Perspective                                                       | 2007 | Boundary objects                |
|     |      | Arun Rai                  |                                                                                                                                    |      | information systems development |
|     |      | Amrit Tiwana              |                                                                                                                                    |      | knowledge boundaries            |
|     |      |                           |                                                                                                                                    |      | knowledge integration           |
|     |      |                           |                                                                                                                                    |      | knowledge management            |
|     |      |                           |                                                                                                                                    |      | process improvement             |
|     |      |                           |                                                                                                                                    |      | project management              |
|     |      |                           |                                                                                                                                    |      | software development            |
| 156 | IEEE | Helle Damborg Frederiksen | A Contextual Approach to Improving Software Metrics                                                                                | 2008 | Contextual approach             |
|     |      | Lars Mathiassen           |                                                                                                                                    |      | information-centric analysis    |

|     |      |                |                                                                                                                                             |      |                                        |
|-----|------|----------------|---------------------------------------------------------------------------------------------------------------------------------------------|------|----------------------------------------|
| 156 | IEEE |                | Practices                                                                                                                                   | 2008 | organization-centric analysis          |
|     |      |                |                                                                                                                                             |      | software metrics improvement           |
| 157 | IEEE | Mbarika, V. W. | An Exploratory Study of Strategies to Improve Africa's Least Developed Economies; Telecommunications Infrastructure: The Stakeholders Speak | 2009 | Economically developing nations        |
|     |      | Byrd, T. A.    |                                                                                                                                             |      | Sub-Saharan Africa                     |
|     |      |                |                                                                                                                                             |      | information technology infrastructure  |
|     |      |                |                                                                                                                                             |      | telecommunications                     |
|     |      |                |                                                                                                                                             |      | teledensity                            |
| 158 | IEEE | Joshi, K. D.   | Excellence in IT Consulting: Integrating Multiple takeholders' Perceptions of Top Performers                                                | 2010 | Information technology (IT) consulting |
|     |      | Kuhn, K. M.    |                                                                                                                                             |      | job performance                        |
|     |      | Niederman, F.  |                                                                                                                                             |      | multiple stakeholders congruity        |
|     |      |                |                                                                                                                                             |      | satisfaction                           |
|     |      |                |                                                                                                                                             |      | top performers attributes              |
|     |      |                |                                                                                                                                             |      | turnover                               |

|     |      |                |                                                                                                                                                           |      |                                  |
|-----|------|----------------|-----------------------------------------------------------------------------------------------------------------------------------------------------------|------|----------------------------------|
| 159 | IEEE | Gil, N.        | Language as a Resource in Project Management: A Case Study and a Conceptual Framework                                                                     | 2010 | Communication                    |
|     |      |                |                                                                                                                                                           |      | language                         |
|     |      |                |                                                                                                                                                           |      | legitimacy                       |
|     |      |                |                                                                                                                                                           |      | local communities                |
|     |      |                |                                                                                                                                                           |      | project stakeholder              |
| 160 | IEEE | Pan, G.        | Transition to IS Project De-Escalation: An Exploration Into Management Executives' Influence Behaviors                                                    | 2011 | Case study                       |
|     |      | Shan Ling Pan  |                                                                                                                                                           |      | de-escalation of commitment      |
|     |      |                |                                                                                                                                                           |      | influence behaviors              |
|     |      |                |                                                                                                                                                           |      | information systems (IS) project |
|     |      |                |                                                                                                                                                           |      | project stakeholders commitment  |
| 161 | IEEE | Brooks, J. M.  | Dueling Stakeholders and Dual-Hatted Systems Engineers: Engineering Challenges, Capabilities, and Skills in Government Infrastructure Technology Projects | 2011 | Enterprise systems               |
|     |      | Carroll, J. S. |                                                                                                                                                           |      | government                       |
|     |      | Beard, J. W.   |                                                                                                                                                           |      | dueling stakeholders             |

|     |      |                   |                                                                                                          |      |                         |
|-----|------|-------------------|----------------------------------------------------------------------------------------------------------|------|-------------------------|
|     |      |                   |                                                                                                          |      | infrastructure          |
|     |      |                   |                                                                                                          |      | systems engineering     |
| 162 | IEEE | Farahmand, F.     | Incentive Alignment and Risk Perception: An Information Security Application                             | 2013 | Alignment               |
|     |      | Atallah, M. J.    |                                                                                                          |      | decision-making         |
|     |      | Spafford, E. H.   |                                                                                                          |      | incentives              |
|     |      |                   |                                                                                                          |      | information security    |
|     |      |                   |                                                                                                          |      | stakeholder perceptions |
|     |      |                   |                                                                                                          |      | perceptions             |
|     |      |                   |                                                                                                          |      | risk                    |
| 163 | IEEE | Wenyu Du          | How to Balance Sustainability and Profitability in Technology Organizations: An Ambidextrous Perspective | 2013 | Sustainability          |
|     |      | Shan Ling Pan     |                                                                                                          |      | ambidexterity           |
|     |      | Meiyun Zuo        |                                                                                                          |      | case study              |
|     |      |                   |                                                                                                          |      | engineering management  |
|     |      |                   |                                                                                                          |      | green IT                |
|     |      |                   |                                                                                                          |      | stakeholders            |
|     |      | Tyson R. Browning |                                                                                                          |      | Opportunity management  |
|     |      |                   |                                                                                                          |      | project difficulty      |



|     |                          |                  |                                                                                                                                                 |      |                                   |
|-----|--------------------------|------------------|-------------------------------------------------------------------------------------------------------------------------------------------------|------|-----------------------------------|
| 164 | IEEE                     |                  | A Quantitative Framework for Managing Project Value, Risk, and Opportunity                                                                      | 2014 | project management                |
|     |                          |                  |                                                                                                                                                 |      | project quality                   |
|     |                          |                  |                                                                                                                                                 |      | risk management                   |
|     |                          |                  |                                                                                                                                                 |      | setting project goals             |
|     |                          |                  |                                                                                                                                                 |      | technical performance measurement |
|     |                          |                  |                                                                                                                                                 |      | value management                  |
| 165 | Information & Management | Boyd, Michael    | Discrepancies between desired and perceived measures of performance of IS professionals: Views of the IS professionals themselves and the users | 2007 | IS users                          |
|     |                          | Huang, Shi-Ming  |                                                                                                                                                 |      | IS personnel                      |
|     |                          | Jiang, James J.  |                                                                                                                                                 |      | IS success                        |
|     |                          | Klein, Gary      |                                                                                                                                                 |      | Job performance measures          |
|     |                          |                  |                                                                                                                                                 |      | Satisfaction                      |
|     |                          |                  |                                                                                                                                                 |      | Discrepancy theory                |
| 166 | Information & Management | Parolia, Neeraj  | Mediators between coordination and IS project performance                                                                                       | 2007 | Horizontal coordination           |
|     |                          | Goodman, Stephen |                                                                                                                                                 |      | Vertical coordination             |
|     |                          | Jiang, James J.  |                                                                                                                                                 |      | Leadership empowerment            |
|     |                          | Li, Yuzhu        |                                                                                                                                                 |      | Knowledge transfer                |
|     |                          |                  |                                                                                                                                                 |      | Clear mission and objectives      |
|     |                          |                  |                                                                                                                                                 |      | Project performance               |
|     |                          | Liu, Chunhui     |                                                                                                                                                 |      | Virtual organizing                |
|     |                          | Sia, Choon-Ling  |                                                                                                                                                 |      | Organizational structure          |
|     |                          | Wei, Kwok-Kee    |                                                                                                                                                 |      | Intent formation modeling         |

|     |                          |                      |                                                                                                                                 |      |                                 |
|-----|--------------------------|----------------------|---------------------------------------------------------------------------------------------------------------------------------|------|---------------------------------|
| 167 | Information & Management |                      | Adopting organizational virtualization in B2B firms: An empirical study in Singapore                                            | 2008 | e-Commerce                      |
|     |                          |                      |                                                                                                                                 |      | Transaction cost theory         |
|     |                          |                      |                                                                                                                                 |      | Institutional theory            |
|     |                          |                      |                                                                                                                                 |      | Capability-based theory         |
| 168 | Information & Management | Hsu, Carol           | Conceptualizing the dynamics of rhetorical practice and technological frame in the context of technology diffusion and adoption | 2014 | Technology diffusion            |
|     |                          | Huang, Jimmy         |                                                                                                                                 |      | Technological frame             |
|     |                          | Galliers, Robert D.  |                                                                                                                                 |      | Rhetorical practice             |
|     |                          |                      |                                                                                                                                 |      | Interpretive case research      |
| 169 | Information & Management | Hsu, Jack Shih-Chieh | Coping knowledge boundaries between information system and business disciplines: An intellectual capital perspective            | 2014 | Knowledge boundary              |
|     |                          | Chu, Tsai-Hsin       |                                                                                                                                 |      | Multidisciplinary collaboration |
|     |                          | Lin, Tung-Ching      |                                                                                                                                 |      | Intellectual capital            |
|     |                          | Lo, Chiao-Fang       |                                                                                                                                 |      | IS development                  |
| 170 | JIT                      | Shirish C Srivastava | Competing technology options and stakeholder interests for tracking freight railcars in Indian Railways                         | 2009 | RFID                            |
|     |                          | Sharat S Mathur      |                                                                                                                                 |      | GPS                             |
|     |                          | Thompson S H Teo     |                                                                                                                                 |      | technology choice               |
|     |                          |                      |                                                                                                                                 |      | options                         |
|     |                          |                      |                                                                                                                                 |      | railroad                        |
|     |                          |                      |                                                                                                                                 |      | India                           |
|     |                          |                      |                                                                                                                                 |      |                                 |

|     |     |                         |                                                                                                                       |      |                                         |
|-----|-----|-------------------------|-----------------------------------------------------------------------------------------------------------------------|------|-----------------------------------------|
| 171 | JIT | Huoy Min Khoo,          | An exploratory study of the impacts of upgrading packaged software: a stakeholder perspective                         | 2011 | packaged software upgrades              |
|     |     | Daniel Robey            |                                                                                                                       |      | software maintenance                    |
|     |     | Srinivasan Venkoba Rao  |                                                                                                                       |      | impacts                                 |
|     |     |                         |                                                                                                                       |      | IT implementation                       |
|     |     |                         |                                                                                                                       |      | case study                              |
|     |     |                         |                                                                                                                       |      | qualitative method                      |
| 172 | JIT | Christina Soh           | Managing diverse stakeholders in enterprise systems projects: a control portfolio approach                            | 2011 | control                                 |
|     |     | Cecil Eng Huang Chua    |                                                                                                                       |      | multiple stakeholders                   |
|     |     | Harminder Singh         |                                                                                                                       |      | project management                      |
|     |     |                         |                                                                                                                       |      | enterprise systems                      |
| 173 | JIT | Christoph Rosenkranz    | Language quality in requirements development: tracing communication in the process of information systems development | 2013 | information systems development process |
|     |     | Marianne Corvera Charaf |                                                                                                                       |      | requirements development                |
|     |     | Roland Holten           |                                                                                                                       |      | requirements engineering                |
|     |     |                         |                                                                                                                       |      | language quality                        |
|     |     |                         |                                                                                                                       |      | communication quality                   |
|     |     |                         |                                                                                                                       |      | shared understanding                    |
|     |     | Heikki Lempinen         |                                                                                                                       |      | IT value                                |
|     |     | Risto Rajala            |                                                                                                                       |      | service process                         |

|     |     |                   |                                                                                           |      |                                 |
|-----|-----|-------------------|-------------------------------------------------------------------------------------------|------|---------------------------------|
| 174 | JIT |                   | Exploring multi-actor value creation<br>in IT service processes                           | 2014 | multi-actor system              |
|     |     |                   |                                                                                           |      | IS organization                 |
|     |     |                   |                                                                                           |      | performance management          |
|     |     |                   |                                                                                           |      | dashboard                       |
| 175 | JOM | Dror Etzion       | Research on Organizations and the Natural<br>Environment, 1992-Present: A Reviews         | 2007 | corporate social responsibility |
|     |     |                   |                                                                                           |      | Environmental                   |
|     |     |                   |                                                                                           |      |                                 |
|     |     |                   |                                                                                           |      |                                 |
| 176 | JOM | Laplume, Andre O. | Stakeholder Theory: Reviewing a Theory That Moves Us                                      | 2008 | stakeholder theory              |
|     |     | Sonpar, Karan     |                                                                                           |      | strategy corporate              |
|     |     | Litz, Reginald A. |                                                                                           |      | social responsibility           |
|     |     |                   |                                                                                           |      | business ethics                 |
| 177 | JOM | Kaptein, Muel     | Developing a Measure of Unethical Behavior in the<br>Workplace: A Stakeholder Perspective | 2008 | business ethics                 |
|     |     |                   |                                                                                           |      | unethical behavior              |
|     |     |                   |                                                                                           |      | measure development             |
|     |     |                   |                                                                                           |      | stakeholder theory              |

|     |     |                    |                                                                                                                                    |      |                                 |
|-----|-----|--------------------|------------------------------------------------------------------------------------------------------------------------------------|------|---------------------------------|
|     |     |                    |                                                                                                                                    |      | business codes                  |
| 178 | JOM | John Peloza        | The Challenge of Measuring Financial Impacts From Investments in Corporate Social Performance                                      | 2009 | corporate social responsibility |
|     |     |                    |                                                                                                                                    |      | environmental responsibility    |
|     |     |                    |                                                                                                                                    |      | stakeholder theory              |
|     |     |                    |                                                                                                                                    |      | sustainability                  |
|     |     |                    |                                                                                                                                    |      | corporate social performance    |
| 179 | JOM | Takeuchi, Riki     | A Critical Reviews of Expatriate Adjustment Research Through a Multiple Stakeholder View: Progress, Emerging Trends, and Prospects | 2010 | Auslandsaufenthalt              |
|     |     |                    |                                                                                                                                    |      | Expatriate assignment           |
|     |     |                    |                                                                                                                                    |      | Familie-Beruf                   |
|     |     |                    |                                                                                                                                    |      | Work-life balance               |
|     |     |                    |                                                                                                                                    |      | Stakeholder                     |
|     |     |                    |                                                                                                                                    |      | Personalmanagement              |
|     |     |                    |                                                                                                                                    |      | Human Resource Management       |
|     |     |                    |                                                                                                                                    |      | Kritik                          |
|     |     |                    |                                                                                                                                    |      | Criticism                       |
| 180 | JOM | Chiu, Shih-Chi     | Legitimacy, visibility, and the antecedents of corporate social performance : an investigation of the instrumental perspective     | 2011 | corporate social responsibility |
|     |     | Sharfman, Mark     |                                                                                                                                    |      | institutional theory            |
|     |     | MICHAEL L. BARNETT |                                                                                                                                    |      | business case                   |
|     |     |                    |                                                                                                                                    |      | corporate misconduct            |

|     |     |                          |                                                                                                            |      |                                                     |
|-----|-----|--------------------------|------------------------------------------------------------------------------------------------------------|------|-----------------------------------------------------|
| 181 | JOM |                          | Why stakeholders ignore firm misconduct: A cognitive view                                                  | 2012 | social cognition                                    |
|     |     |                          |                                                                                                            |      | social control                                      |
|     |     |                          |                                                                                                            |      | stakeholder theory                                  |
| 182 | JOM | Herman Aguinis           | What We Know and Don't Know About Corporate Social Responsibility<br>A Reviews and Research Agenda         | 2012 | corporate social responsibility                     |
|     |     | Ante Glavas              |                                                                                                            |      | sustainability                                      |
|     |     |                          |                                                                                                            |      | microfoundations of corporate social responsibility |
|     |     |                          |                                                                                                            |      | corporate citizenship                               |
|     |     |                          |                                                                                                            |      | corporate social performance                        |
| 183 | JOM | Schnackenberg, Andrew K. | Organizational Transparency: A New Perspective on Managing Trust in Organization-Stakeholder Relationships | 2014 | transparency                                        |
|     |     | Tomlinson, Edward C.     |                                                                                                            |      | disclosure                                          |
|     |     |                          |                                                                                                            |      | clarity                                             |
|     |     |                          |                                                                                                            |      | accuracy                                            |
|     |     |                          |                                                                                                            |      | stakeholders                                        |
|     |     |                          |                                                                                                            |      | trust                                               |
|     |     |                          |                                                                                                            |      | trustworthiness                                     |
| 184 | JOM | He Gao                   | The Use of Public Language in Strategy: A Multidisciplinary Reviews and Research Agenda                    | 2015 | language                                            |
|     |     | Tieying Yu               |                                                                                                            |      | competitor                                          |
|     |     | Albert A. Cannella Jr.   |                                                                                                            |      | stakeholder                                         |
|     |     |                          |                                                                                                            |      | impression management                               |

|     |      |                   |                                                                                                      |      |                            |
|-----|------|-------------------|------------------------------------------------------------------------------------------------------|------|----------------------------|
|     |      |                   |                                                                                                      |      | signal                     |
| 185 | JPIM | Driessen, Paul H. | Integrating Multiple Stakeholder Issues in New Product Development: An Exploration                   | 2013 | Social Responsibility      |
|     |      | Hillebrand, Bas   |                                                                                                      |      | New Product Development    |
|     |      |                   |                                                                                                      |      | Stakeholders               |
|     |      |                   |                                                                                                      |      | Green NPD                  |
|     |      |                   |                                                                                                      |      | Casestudy analysis         |
| 186 | JPIM | Olson, Erik L.    | The Green Innovation Value Chain:<br>A Tool for Evaluating the Diffusion Prospects of Green Products | 2013 | Value Chain                |
|     |      |                   |                                                                                                      |      | Lifecycle Analysis,        |
|     |      |                   |                                                                                                      |      | Multi-Stakeholder          |
|     |      |                   |                                                                                                      |      | Green Innovation Diffusion |
|     |      |                   |                                                                                                      |      | Hybrid Vehicles            |

|     |       |                                 |                                                                                                    |      |                                      |
|-----|-------|---------------------------------|----------------------------------------------------------------------------------------------------|------|--------------------------------------|
| 187 | JPIM  | Daniel Robeson                  | Boards of Directors, Innovation, and Performance:<br>An Exploration at Multiple Levels             | 2013 | Innovation                           |
|     |       | Gina Colarelli O'Connor         |                                                                                                    |      | Governance                           |
| 188 | Omega | Geldermann, Jutta               | Multi-criteria decision support and evaluation of strategies<br>for nuclear remediation management | 2009 | Decision support systems             |
|     |       | Bertsch, Valentin               |                                                                                                    |      | Emergency and remediation management |
|     |       | Treitz, Martin                  |                                                                                                    |      | Multi-criteria evaluation            |
|     |       | French, Simon                   |                                                                                                    |      | Stakeholder involvement              |
|     |       | Papamichail, Konstantinia<br>N. |                                                                                                    |      | Natural language generation          |
|     |       | Hämäläinen, R. P.               |                                                                                                    |      |                                      |
| 189 | Omega | P.L.Kunsch                      | Modelling complex ethical decision problems with                                                   | 2000 | Philosophy of OR                     |
|     |       | I.Kavathatzopoulos              |                                                                                                    |      | Decision-making process              |



|     |       |                    |                                                                                  |      |                  |
|-----|-------|--------------------|----------------------------------------------------------------------------------|------|------------------|
| 187 | Omega | F.Rauschmayer      | operations research                                                              | 2007 | Group decisions  |
|     |       |                    |                                                                                  |      | Systems          |
| 190 | Omega | F.Rauschmayer      | Why good practice of OR is not enough—Ethical challenges for the OR practitioner | 2009 | OR and ethics    |
|     |       | I.Kavathatzopoulos |                                                                                  |      | Philosophy of OR |
|     |       | P.L.Kunsch         |                                                                                  |      | Uncertainty      |
|     |       | M.Le Menestrel     |                                                                                  |      | Dilemmas         |
|     |       |                    |                                                                                  |      | Dynamic systems  |
| 191 | Omega | Fred Wenstøp       | On operations research and value conflicts                                       | 2009 | Ethics           |
|     |       | Haavard Koppang    |                                                                                  |      | Value conflict   |
|     |       |                    |                                                                                  |      | Emotion          |
|     |       |                    |                                                                                  |      | Decision-making  |
|     |       |                    |                                                                                  |      | Discourse ethics |

|     |       |                  |                                                                                                                                                                      |      |                                        |
|-----|-------|------------------|----------------------------------------------------------------------------------------------------------------------------------------------------------------------|------|----------------------------------------|
| 192 | Omega | Necmi K. Avkiran | Benchmarking firm performance from a multiple-stakeholder perspective with an application to Chinese banking                                                         | 2010 | DEA                                    |
|     |       | Hiroshi Morita   |                                                                                                                                                                      |      | Multicriteria                          |
|     |       |                  |                                                                                                                                                                      |      | Banking                                |
|     |       |                  |                                                                                                                                                                      |      | Policy analysis                        |
| 193 | SJM   | Lise Backer      | Narrating organisational identities by way of evolutionary tales, Talking Shell from an oil to an energy company                                                     | 2008 | Narration of organisational identities |
|     |       |                  |                                                                                                                                                                      |      | Greening of oil business               |
| 194 | SJM   | Reinhard Steurer | Business–society relations in Central-Eastern and Western Europe: How those who lead in sustainability reporting bridge the gap in corporate (social) responsibility | 2009 | Corporate (social) responsibility (CR) |
|     |       | Astrid Konrad    |                                                                                                                                                                      |      | Corporate sustainability               |
|     |       |                  |                                                                                                                                                                      |      | Sustainable development                |
|     |       |                  |                                                                                                                                                                      |      | Stakeholder management                 |
|     |       |                  |                                                                                                                                                                      |      | Sustainability reporting               |
|     |       |                  |                                                                                                                                                                      |      | Environmental reporting                |
|     |       |                  |                                                                                                                                                                      |      | Global Reporting Initiative/GRI        |
|     |       |                  |                                                                                                                                                                      |      | Central-Eastern Europe (CEE)           |
|     |       |                  |                                                                                                                                                                      |      | Eastern Europe                         |
|     |       |                  |                                                                                                                                                                      |      | Western Europe                         |
|     |       |                  |                                                                                                                                                                      |      |                                        |
|     |       |                  |                                                                                                                                                                      |      |                                        |

|     |     |                    |                                                                                                                   |      |                                  |
|-----|-----|--------------------|-------------------------------------------------------------------------------------------------------------------|------|----------------------------------|
| 195 | SJM | Manning, Stephan   | Linking local experiments to global standards: How project networks promote global institution-building           | 2010 | Global standards                 |
|     |     | von Hagen, Oliver  |                                                                                                                   |      | Global institution-building      |
|     |     |                    |                                                                                                                   |      | Project networks                 |
|     |     |                    |                                                                                                                   |      | Multi-stakeholder process        |
|     |     |                    |                                                                                                                   |      | Institutional entrepreneurship   |
|     |     |                    |                                                                                                                   |      | Development projects             |
| 196 | SJM | Aaltonen, Kirsi    | A project lifecycle perspective on stakeholder influence strategies in global projects                            | 2010 | Secondary stakeholders           |
|     |     | Kujala, Jaakko     |                                                                                                                   |      | Global projects                  |
|     |     |                    |                                                                                                                   |      | Project stakeholder management   |
|     |     |                    |                                                                                                                   |      | Stakeholder influence strategies |
|     |     |                    |                                                                                                                   |      | Stakeholder salience             |
|     |     |                    |                                                                                                                   |      | Project lifecycle                |
| 197 | SJM | Del Bosco, Barbara | Keeping the enemies close: The contribution of corporate social responsibility to reducing crime against the firm | 2011 | Corporate security               |
|     |     | Misani, Nicola     |                                                                                                                   |      | Crime                            |
|     |     |                    |                                                                                                                   |      | Stakeholder theory               |
|     |     |                    |                                                                                                                   |      | Corporate social responsibility  |
|     |     |                    |                                                                                                                   |      | Legitimacy                       |
|     |     |                    |                                                                                                                   |      |                                  |
| 198 | SJM | Helin, Sven        | Like a battalion of tanks: A critical analysis of stakeholder management                                          | 2013 | Communication                    |
|     |     | Jensen, Tommy      |                                                                                                                   |      | Information                      |
|     |     | Johan Sandström    |                                                                                                                   |      | Political                        |

|     |                  |                 |                                                                                                            |      |                        |
|-----|------------------|-----------------|------------------------------------------------------------------------------------------------------------|------|------------------------|
|     |                  |                 |                                                                                                            |      | Responsibility         |
|     |                  |                 |                                                                                                            |      | Stakeholder management |
| 199 | R&D<br>Mangement | Miller, Kristel | The changing university business model: a stakeholder<br>perspective                                       | 2014 |                        |
|     |                  | McAdam, Maura   |                                                                                                            |      |                        |
|     |                  | McAdam, Rodney  |                                                                                                            |      |                        |
| 200 | R&D<br>Mangement | Arun A. Elias   | Analysing the stakes of stakeholders in research and<br>development project management: a systems approach | 2015 |                        |
|     |                  |                 |                                                                                                            |      |                        |

|     |                    |                      |                                                                                                                                                |      |                                  |
|-----|--------------------|----------------------|------------------------------------------------------------------------------------------------------------------------------------------------|------|----------------------------------|
| 201 | R&D<br>Mangement   | María Vaquero Martin | Stakeholder integration in new product development a<br>systematic analysis of drivers and firm capabilities<br>Stakeholder integration in NPD | 2016 |                                  |
|     |                    | Sebastian Gurtner    |                                                                                                                                                |      |                                  |
|     |                    | Ronny Reinhardt      |                                                                                                                                                |      |                                  |
| 202 | Research<br>Policy | Wagner, Marcus       | On the relationship between environmental management,<br>environmental innovation and patenting: Evidence from<br>German manufacturing firms   | 2007 | Innovation                       |
|     |                    |                      |                                                                                                                                                |      | Environmental management systems |
|     |                    |                      |                                                                                                                                                |      | Stakeholders                     |
|     |                    |                      |                                                                                                                                                |      | Patent                           |
| 203 | Research<br>Policy | Birgitte Andersen    | In search of a useful theory of the productive potential of<br>intellectual property rights                                                    | 2008 | Intellectual property rights     |
|     |                    |                      |                                                                                                                                                |      | Productive systems               |
|     |                    |                      |                                                                                                                                                |      | Governance                       |
|     |                    |                      |                                                                                                                                                |      | Value creation and distribution  |
|     |                    |                      |                                                                                                                                                |      | Conflict                         |

|     |                 |                     |                                                                                                       |      |                                      |
|-----|-----------------|---------------------|-------------------------------------------------------------------------------------------------------|------|--------------------------------------|
| 204 | Research Policy | Adler, Niclas       | The challenge of managing boundary-spanning research activities: Experiences from the Swedish context | 2009 | Research management                  |
|     |                 | Elmquist, Maria     |                                                                                                       |      | Research leadership                  |
|     |                 | Norrgren, Flemming  |                                                                                                       |      | Boundary-spanning research           |
|     |                 |                     |                                                                                                       |      | Balancing multiple stakeholders      |
|     |                 |                     |                                                                                                       |      | Collaborative research               |
| 205 | Research Policy | Robert K. Perrons   | The open kimono: How Intel balances trust and power to maintain platform leadership                   | 2009 | Trust                                |
|     |                 |                     |                                                                                                       |      | Power                                |
|     |                 |                     |                                                                                                       |      | Intel                                |
|     |                 |                     |                                                                                                       |      | Inter-firm relationships             |
|     |                 |                     |                                                                                                       |      | Platform leadership                  |
| 206 | Research Policy | Roelofsen, Anneloes | Stakeholder interaction within research consortia on emerging technologies: Learning how and what?    | 2011 | User involvement                     |
|     |                 | Boon, Wouter P. C.  |                                                                                                       |      | Multi-stakeholder dialogue           |
|     |                 | Kloet, Roy R.       |                                                                                                       |      | Publicate-private research consortia |

|     |                 |                           |                                                                                       |      |                      |
|-----|-----------------|---------------------------|---------------------------------------------------------------------------------------|------|----------------------|
|     |                 | Broerse, Jacqueline E. W. |                                                                                       |      | Learning             |
| 207 | Research Policy | Romijn, Henny A.          | The Jatropha biofuels sector in Tanzania 2005-2009: Evolution towards sustainability? | 2011 | Biofuels             |
|     |                 | Canis, Marjolein C. J.    |                                                                                       |      | Evolutionary theory  |
|     |                 |                           |                                                                                       |      | Innovation systems   |
|     |                 |                           |                                                                                       |      | Sustainability       |
|     |                 |                           |                                                                                       |      | Stakeholder conflict |
|     |                 |                           |                                                                                       |      | Learning             |
|     |                 |                           |                                                                                       |      | Tanzania             |
| 208 | Research Policy | Cuppen, Eefje             | A quasi-experimental evaluation of learning in a stakeholder dialogue on bio-energy   | 2012 | Stakeholder dialogue |
|     |                 |                           |                                                                                       |      | Participation        |
|     |                 |                           |                                                                                       |      | Learning             |
|     |                 |                           |                                                                                       |      | Q methodology        |
|     |                 |                           |                                                                                       |      | Biomass              |
|     |                 |                           |                                                                                       |      | Evaluation           |
|     |                 | Nuno Gil                  |                                                                                       |      | Innovation           |

|     |                 |                   |                                                                                                                 |      |                                          |
|-----|-----------------|-------------------|-----------------------------------------------------------------------------------------------------------------|------|------------------------------------------|
| 209 | Research Policy | Marcela Miozzo    | The innovation potential of new infrastructure development: An empirical study of Heathrow airport's T5 project | 2012 | Technology adoption                      |
|     |                 | Silvia Massini    |                                                                                                                 |      | New infrastructure development           |
|     |                 |                   |                                                                                                                 |      | Large socio-technical systems            |
|     |                 |                   |                                                                                                                 |      | Projects                                 |
| 210 | Research Policy | Rodríguez, Hannot | Integrating science and society in European Framework Programmes: Trends in project-level solicitations         | 2013 | Socio-technical integration              |
|     |                 | Fisher, Erik      |                                                                                                                 |      | EU Framework Programmes                  |
|     |                 | Schuurbiers, Daan |                                                                                                                 |      | Research solicitations                   |
|     |                 |                   |                                                                                                                 |      | ELSA (Ethical, Legal and Social Aspects) |
|     |                 |                   |                                                                                                                 |      | Stakeholder engagement                   |
|     |                 |                   |                                                                                                                 |      | Responsible innovation                   |
| 211 | Research Policy | Xudong Gao        | A latecomer's strategy to promote a technology standard: The case of Datang and TD-SCDMA                        | 2014 | Technology standard                      |
|     |                 |                   |                                                                                                                 |      | TD-SCDMA                                 |
|     |                 |                   |                                                                                                                 |      | Latecomer disadvantage                   |
|     |                 |                   |                                                                                                                 |      | Transitional institutions                |
|     |                 |                   |                                                                                                                 |      | Firm strategy                            |
|     |                 | P. Lehoux         |                                                                                                                 |      | Business model                           |



|     |                 |                        |                                                                                                                                              |      |                                                          |
|-----|-----------------|------------------------|----------------------------------------------------------------------------------------------------------------------------------------------|------|----------------------------------------------------------|
| 212 | Research Policy | G. Daudelin            | How do business model and health technology design influence each other? Insights from a longitudinal case study of three academic spin-offs | 2014 | Innovation management                                    |
|     |                 | B. Williams-Jones      |                                                                                                                                              |      | Academic spin-offs                                       |
|     |                 | J.-L. Denis            |                                                                                                                                              |      | Medical devices                                          |
|     |                 | C. Longo               |                                                                                                                                              |      | R&D                                                      |
| 213 | TFSC            | Emma Gutiérrez de Mesa | Foresight on biopharmaceuticals: Designing foresight methods for Spanish biopharmaceuticals                                                  | 2007 | Foresight exercise                                       |
|     |                 | Emilio Muñoz           |                                                                                                                                              |      | Foresight methods                                        |
|     |                 |                        |                                                                                                                                              |      | Spanish sectoral innovation system on biopharmaceuticals |
|     |                 |                        |                                                                                                                                              |      | Systemic failures                                        |
|     |                 |                        |                                                                                                                                              |      | Foresight and innovation                                 |
| 214 | TFSC            | Shin, Dong Hee         | The assessment of 3rd generation mobile policy in Korea: A web of stakeholder analysis                                                       | 2008 | IMT-2000;3G                                              |
|     |                 |                        |                                                                                                                                              |      | Korean mobile market                                     |
|     |                 |                        |                                                                                                                                              |      | Actor network theory                                     |
|     |                 | Claudio Roveda         |                                                                                                                                              |      | Foresight                                                |
|     |                 | Riccardo Vecchiato     |                                                                                                                                              |      | Scenarios                                                |
|     |                 |                        |                                                                                                                                              |      | Interactive workshop                                     |

|     |      |                        |                                                                                                                                  |      |                                         |
|-----|------|------------------------|----------------------------------------------------------------------------------------------------------------------------------|------|-----------------------------------------|
| 215 | TFSC |                        | Foresight and innovation in the context of industrial clusters: The case of some Italian districts                               | 2008 | Critical technology list                |
|     |      |                        |                                                                                                                                  |      | Industrial cluster                      |
|     |      |                        |                                                                                                                                  |      | International competitiveness           |
|     |      |                        |                                                                                                                                  |      | Tacit and explicit knowledge            |
| 216 | TFSC | Philip J. Vergragt     | Genetic engineering in agriculture: New approaches for risk management through sustainability reporting                          | 2008 | Genetically Modified Organisms, GMOs    |
|     |      | Halina Szejnwald Brown |                                                                                                                                  |      | Global Reporting Initiative, GRI        |
|     |      |                        |                                                                                                                                  |      | Constructive Technology Assessment, CTA |
| 217 | TFSC | Jennie C. Stephens     | Socio-Political Evaluation of Energy Deployment (SPEED): An integrated research framework analyzing energy technology deployment | 2008 | Deployment                              |
|     |      | Elizabeth J. Wilson    |                                                                                                                                  |      | Energy technology                       |
|     |      | Tarla Rai Peterson     |                                                                                                                                  |      | Technology diffusion                    |
|     |      |                        |                                                                                                                                  |      | Technology innovation                   |

|     |      |                      |                                                                                                                                                         |      |                                          |
|-----|------|----------------------|---------------------------------------------------------------------------------------------------------------------------------------------------------|------|------------------------------------------|
|     |      |                      |                                                                                                                                                         |      | Climate change mitigation                |
| 218 | TFSC | Rob P.J.M. Raven     | ESTEEM: Managing societal acceptance in new energy projects: A toolbox method for project managers                                                      | 2009 | Social acceptance of technology          |
|     |      | Eric Jolivet         |                                                                                                                                                         |      | ESTEEM                                   |
|     |      | Ruth M. Mourik       |                                                                                                                                                         |      | Participatory technology assessment      |
|     |      | Ynke C.F.J. Feenstra |                                                                                                                                                         |      | CCS                                      |
| 219 | TFSC | Yoshinori Nakagawa   | Assessment of social implications of nanotechnologies in Japan: Application of problem structuring method based on interview surveys and cognitive maps | 2010 | ELSI (ethical, legal, and social issues) |
|     |      | Hideaki Shiroyama    |                                                                                                                                                         |      | Technology assessment                    |
|     |      | Kotaro Kuroda        |                                                                                                                                                         |      | Problem structuring method               |
|     |      |                      |                                                                                                                                                         |      | Cognitive map                            |
| 220 | TFSC | Damien Giurcoa       | Backcasting energy futures using industrial ecology                                                                                                     | 2011 | Coal                                     |
|     |      | Brett Cohenb         |                                                                                                                                                         |      | Scenarios                                |
|     |      | Edward Langhama      |                                                                                                                                                         |      | Regional futures                         |

|     |      |                   |                                                                                                |      |                             |
|-----|------|-------------------|------------------------------------------------------------------------------------------------|------|-----------------------------|
|     |      | Matthew Warnkenc  |                                                                                                |      | Industrial ecology          |
|     |      |                   |                                                                                                |      | Life cycle assessment       |
| 221 | TFSC | Svenfelt, Å       | Decreasing energy use in buildings by 50% by 2050—A backcasting study using stakeholder groups | 2011 | Backcasting                 |
|     |      | Engström, R       |                                                                                                |      | Buildings                   |
|     |      | Svane, Ö          |                                                                                                |      | Energy use                  |
|     |      |                   |                                                                                                |      | Focus groups                |
|     |      |                   |                                                                                                |      | Stakeholders                |
|     |      |                   |                                                                                                |      | Policy measures             |
| 222 | TFSC | Jaco Quista       | The impact and spin-off of participatory backcasting: From vision to niche                     | 2011 | Participatory backcasting   |
|     |      | Wil Thissenb      |                                                                                                |      | Stakeholders                |
|     |      | Philip J.Vergragt |                                                                                                |      | Learning                    |
|     |      |                   |                                                                                                |      | Future vision               |
|     |      |                   |                                                                                                |      | System innovation           |
|     |      |                   |                                                                                                |      | Socio-technical transitions |

|     |      |                    |                                                                                                               |      |                           |
|-----|------|--------------------|---------------------------------------------------------------------------------------------------------------|------|---------------------------|
|     |      |                    |                                                                                                               |      | Sustainability foresight  |
| 223 | TFSC | Kok, Kasper        | Combining participative backcasting and exploratory scenario development: Experiences from the SCENES project | 2011 | Europe                    |
|     |      | van Vliet, Mathijs |                                                                                                               |      | Scenario                  |
|     |      | Bärlund, Ilona     |                                                                                                               |      | Exploratory methods       |
|     |      | Dubel, Anna        |                                                                                                               |      | Backcasting               |
|     |      | Sendzimir, Jan     |                                                                                                               |      | Stakeholder participation |
| 224 | TFSC | Shin,Dong-Hee      | The switchover to digital broadcasting in Korea                                                               | 2012 | Digital TV transition     |
|     |      | Song,Hae-Ryong     |                                                                                                               |      | Digital switchover        |
|     |      |                    |                                                                                                               |      | Stakeholder analysis      |
|     |      |                    |                                                                                                               |      | Socio-technical framework |
|     |      |                    |                                                                                                               |      | South Korea               |
|     |      | Martin Zimmermann  |                                                                                                               |      | Backcasting               |
|     |      | Inga-Lena Darkow   |                                                                                                               |      | Rigour                    |

|     |      |                        |                                                                                                                           |      |                            |
|-----|------|------------------------|---------------------------------------------------------------------------------------------------------------------------|------|----------------------------|
| 225 | TFSC | Heiko A.von der Gracht | Integrating Delphi and participatory backcasting in pursuit of trustworthiness — The case of electric mobility in Germany | 2012 | Trustworthiness            |
|     |      |                        |                                                                                                                           |      | Delphi                     |
|     |      |                        |                                                                                                                           |      | Semi-structured interviews |
|     |      |                        |                                                                                                                           |      | Electric mobility          |
| 226 | TFSC | Cairns, George         | Scenario method and stakeholder engagement: Critical reflections on a climate change scenarios case study                 | 2013 | Scenario method            |
|     |      | Ahmed, Iftekhar        |                                                                                                                           |      | Climate change adaptation  |
|     |      | Mullett, Jane          |                                                                                                                           |      | Stakeholder engagement     |
|     |      | Wright, George         |                                                                                                                           |      | Policy                     |
|     |      |                        |                                                                                                                           |      | Planning                   |
|     |      |                        |                                                                                                                           |      | Contingent factors         |
| 227 | TFSC | Hernantes,Josune       | Learning before the storm: Modeling multiple stakeholder activities in support of crisis management, a practical case     | 2013 | Crisis management          |
|     |      | Rich,Eliot             |                                                                                                                           |      | Modeling                   |
|     |      | Laugé, Ana             |                                                                                                                           |      | System Dynamics            |
|     |      | Labaka,Leire           |                                                                                                                           |      | Group Model Building       |

|     |      |                     |                                                                                                                                         |      |                                  |
|-----|------|---------------------|-----------------------------------------------------------------------------------------------------------------------------------------|------|----------------------------------|
|     |      | Sarriegi, Jose M.   |                                                                                                                                         |      |                                  |
| 228 | TFSC | Lo, Chih-Cheng      | The national innovation system in the Taiwanese photovoltaic industry: A multiple stakeholder perspective                               | 2013 | National Innovation System (NIS) |
|     |      | Wang, Chun-Hsien    |                                                                                                                                         |      | Multiple stakeholder analysis    |
|     |      | Huang, Chun-Chie    |                                                                                                                                         |      | Photovoltaic industry (PV)       |
|     |      |                     |                                                                                                                                         |      | Convergence                      |
|     |      |                     |                                                                                                                                         |      | MACTOR                           |
| 229 | TFSC | Christoph Markmann  | A Delphi-based risk analysis — Identifying and assessing future challenges for supply chain security in a multi-stakeholder environment | 2013 | Risk                             |
|     |      | Heik von der Gracht |                                                                                                                                         |      | Supply chain security            |
|     |      | Inga-Lena Darkow    |                                                                                                                                         |      | Terroristic attacks              |
|     |      |                     |                                                                                                                                         |      | Delphi                           |
|     |      |                     |                                                                                                                                         |      | Multi-stakeholder                |
|     |      |                     |                                                                                                                                         |      | Future                           |

|     |      |                        |                                                                                                                                                      |      |                                  |
|-----|------|------------------------|------------------------------------------------------------------------------------------------------------------------------------------------------|------|----------------------------------|
| 230 | TFSC | Sylvia Breukers        | Analysing the past and exploring the future of sustainable biomass. Participatory stakeholder dialogue and technological innovation systems research | 2014 | Sustainability                   |
|     |      | Matthijs Hisschemöller |                                                                                                                                                      |      | Biomass                          |
|     |      | Eefje Cuppen           |                                                                                                                                                      |      | Technological innovation systems |
|     |      | Roald Suurs            |                                                                                                                                                      |      | Stakeholder dialogue             |
|     |      |                        |                                                                                                                                                      |      | Backcasting                      |
| 231 | TFSC | Bernadette Förster     | Assessing Delphi panel composition for strategic foresight — A comparison of panels based on company-internal and external participants              | 2014 | Decision making                  |
|     |      | Heikvon der Gracht     |                                                                                                                                                      |      | Advice seeking                   |
|     |      |                        |                                                                                                                                                      |      | Delphi                           |
|     |      |                        |                                                                                                                                                      |      | Multiple stakeholder             |
|     |      |                        |                                                                                                                                                      |      | Expert                           |
| 232 | TFSC | Alcon, Francisco       | Forecasting deficit irrigation adoption using a mixed stakeholder assessment methodology                                                             | 2014 | Irrigation                       |
|     |      | Tapsuwan, Sorada       |                                                                                                                                                      |      | Technology                       |
|     |      |                        |                                                                                                                                                      |      | Adoption                         |
|     |      | José M. Martínez-Paz   |                                                                                                                                                      |      | Spain                            |
|     |      | Roy Brouwer            |                                                                                                                                                      |      | Stakeholders                     |



|     |      |                              |                                                        |      |                           |
|-----|------|------------------------------|--------------------------------------------------------|------|---------------------------|
|     |      | María D. de Miguel           |                                                        |      | SWOT                      |
|     |      |                              |                                                        |      | Delphi                    |
| 233 | TFSC | Raele,Ricardo                | Scenarios for the second generation ethanol in Brazil  | 2014 | Scenarios                 |
|     |      | Boaventura, J. Mauricio Gama |                                                        |      | Scenario method           |
|     |      | Fischmann, Adalberto A.      |                                                        |      | Second generation ethanol |
|     |      | Sarturi, Greici              |                                                        |      | Stakeholder analysis      |
| 234 | TFSC | Soste, Leon                  | Engendering stakeholder ownership in scenario planning | 2015 | Stakeholder ownership     |
|     |      | Wang, Q. J.                  |                                                        |      | Stakeholder engagement    |
|     |      | Robertson, David             |                                                        |      | Scenario planning         |
|     |      | Chaffè, Robert               |                                                        |      |                           |
|     |      | Handley, Selina              |                                                        |      |                           |
|     |      | Wei,Yongping                 |                                                        |      |                           |
|     |      | Patrícia Fortesa             |                                                        |      | Storylines                |

|     |      |                   |                                                                                                    |      |                                     |
|-----|------|-------------------|----------------------------------------------------------------------------------------------------|------|-------------------------------------|
| 235 | TFSC | António Alvarenga | Long-term energy scenarios: Bridging the gap between socio-economic storylines and energy modeling | 2015 | Participatory process               |
|     |      | Júlia Seixasa     |                                                                                                    |      | Quantitative scenario               |
|     |      | Sofia Rodrigues   |                                                                                                    |      | Energy modeling                     |
|     |      |                   |                                                                                                    |      | Energy scenario                     |
| 236 | TFSC | Dimitri Gagliardi | Material data matter — Standard data format for engineering materials                              | 2015 | Innovation in materials data models |
|     |      |                   |                                                                                                    |      | Standardisation                     |
|     |      |                   |                                                                                                    |      | Materials data                      |
|     |      |                   |                                                                                                    |      | Engineering materials               |
| 237 | TFSC | Ron Bradfielda    | Teaching scenario analysis—An action learning pedagogy                                             | 2015 | Action learning                     |
|     |      | George Cairns     |                                                                                                    |      | Scenario analysis                   |
|     |      | George Wright     |                                                                                                    |      | Critical pedagogy                   |
|     |      |                   |                                                                                                    |      | Intuitive logics                    |
|     |      |                   |                                                                                                    |      | Stakeholder analysis                |
| 238 | TFSC | Kyujin Jung       | Assessing the evolutionary structure of homeless network,                                          | 2016 | Homeless network                    |
|     |      | Jesus N. Valero   |                                                                                                    |      | Evolutionary structure              |

|     |      |                 |                                                                                                   |      |                          |
|-----|------|-----------------|---------------------------------------------------------------------------------------------------|------|--------------------------|
| 238 | TFSC |                 | Social media use, keywords, and influential stakeholders                                          | 2010 | Social media use         |
|     |      |                 |                                                                                                   |      | Influential stakeholders |
| 239 | TFSC | Chunguang Zhao  | Can social responsibility reduce operational risk: Empirical analysis of Chinese listed companies | 2016 | Social responsibility    |
|     |      | Hang Song       |                                                                                                   |      | Operational risk         |
|     |      | Wanyi Chen      |                                                                                                   |      | Information disclosure   |
|     |      |                 |                                                                                                   |      | Sustainable growth       |
| 240 | TFSC | Martin Rhisiart | From foresight to impact? The 2030 Future of Work scenarios                                       | 2016 | Foresight                |
|     |      | Eckhard Störmer |                                                                                                   |      | Scenarios                |
|     |      | Cornelia Daheim |                                                                                                   |      | Impact                   |
|     |      |                 |                                                                                                   |      | Engagement               |
|     |      | Elena Tavella   |                                                                                                   |      | Technology assessment    |

|     |      |                    |                                                                                                                                                              |      |                             |
|-----|------|--------------------|--------------------------------------------------------------------------------------------------------------------------------------------------------------|------|-----------------------------|
| 241 | TFSC |                    | How to make Participatory Technology Assessment in agriculture more “participatory”: The case of genetically modified plants                                 | 2016 | Critical Systems Heuristics |
|     |      |                    |                                                                                                                                                              |      | Agriculture                 |
|     |      |                    |                                                                                                                                                              |      | GMOs                        |
| 242 | TFSC | George Cairns      | Promoting articulated action from diverse stakeholders in response to public policy scenarios: A case analysis of the use of ‘scenario improvisation’ method | 2016 | Scenario method             |
|     |      | George Wright      |                                                                                                                                                              |      | Stakeholders                |
|     |      | Peter Fairbrother  |                                                                                                                                                              |      | Improvisation               |
|     |      |                    |                                                                                                                                                              |      | Reframing                   |
|     |      |                    |                                                                                                                                                              |      | Policy                      |
| 243 | JBE  | Chenting Su        | Enabling Guanxi Management in China:<br>A Hierarchical Stakeholder Model<br>of Effective Guanxi                                                              | 2007 | China                       |
|     |      | Ronald K. Mitchell |                                                                                                                                                              |      | guanxi                      |
|     |      | M. Joseph Sirgy    |                                                                                                                                                              |      | guanxi management           |
|     |      |                    |                                                                                                                                                              |      | stakeholder salience        |

|     |     |                        |                                                                                                        |      |                                    |
|-----|-----|------------------------|--------------------------------------------------------------------------------------------------------|------|------------------------------------|
| 244 | JBE | J. Garcia de Madariaga | Stakeholders Management Systems: Empirical Insights from Relationship Marketing and Market Orientation | 2007 | stakeholders                       |
|     |     | C. Valor               |                                                                                                        |      | stakeholders management systems    |
|     |     |                        |                                                                                                        |      | corporate social responsibility    |
|     |     |                        |                                                                                                        |      | market orientation                 |
|     |     |                        |                                                                                                        |      | relationship marketing             |
|     |     |                        |                                                                                                        |      | case analysis                      |
|     |     |                        |                                                                                                        |      | ethical indexes managers           |
|     |     |                        |                                                                                                        |      |                                    |
| 245 | JBE | Nicholas Dew           | Innovations, Stakeholders & Entrepreneurship                                                           | 2007 | effectuation                       |
|     |     | Saras D. Sarasvathy    |                                                                                                        |      | entrepreneurship                   |
|     |     |                        |                                                                                                        |      | innovation                         |
|     |     |                        |                                                                                                        |      | stakeholder                        |
| 246 | JBE | Anita Jose             | Environmental Reporting of Global Corporations: A Content Analysis based on Website Disclosures        | 2007 | environmental disclosures          |
|     |     | Shang-Mei Lee          |                                                                                                        |      | environmental management practices |
|     |     |                        |                                                                                                        |      | global corporations                |
|     |     |                        |                                                                                                        |      | content analysis                   |
|     |     |                        |                                                                                                        |      | business ethics                    |
|     |     |                        |                                                                                                        |      | corporate citizenship              |
|     |     | Frank J. de Graaf      |                                                                                                        |      | corporate governance               |

|     |     |                       |                                                                                                              |      |                                                                |
|-----|-----|-----------------------|--------------------------------------------------------------------------------------------------------------|------|----------------------------------------------------------------|
| 247 | JBE | Cor A. J. Herkströter | How Corporate Social Performance Is Institutionalised Within the Governance Structure                        | 2007 | corporate social performance                                   |
|     |     |                       |                                                                                                              |      | stakeholder influence                                          |
| 248 | JBE | Niklas Egels-Zandén   | Post-Partnership Strategies for Defining Corporate Responsibility: The Business Social Compliance Initiative | 2007 | actor-network theory (ANT)                                     |
|     |     | Evelina               |                                                                                                              |      | Business Social Compliance Initiative (BSCI), codes of conduct |
|     |     |                       |                                                                                                              |      | corporate responsibility                                       |
|     |     |                       |                                                                                                              |      | garment industry                                               |
|     |     |                       |                                                                                                              |      | institutional theory                                           |
|     |     |                       |                                                                                                              |      | partnership                                                    |
|     |     |                       |                                                                                                              |      | supplier relations Introduction                                |
|     |     |                       |                                                                                                              |      |                                                                |
| 249 | JBE | Thomas Beschorner     | Social Standards: Toward an Active Ethical Involvement of Businesses in Developing Countries                 | 2007 | social standards                                               |
|     |     | Martin Müller         |                                                                                                              |      | social accountability 8000                                     |
|     |     |                       |                                                                                                              |      | accountability 1000                                            |
|     |     |                       |                                                                                                              |      | reflexive modernity                                            |
|     |     |                       |                                                                                                              |      | reflexivity                                                    |
|     |     |                       |                                                                                                              |      | dialog                                                         |
|     |     |                       |                                                                                                              |      | institutionalization                                           |
|     |     |                       |                                                                                                              |      | developing countries                                           |
| 250 | JBE | Gordon F. Woodbine    | Moral Choice and the Concept of Motivational Typologies: An Extended Stakeholder Perspective in a Western    | 2008 | agency problem                                                 |
|     |     |                       |                                                                                                              |      | stakeholder theory                                             |

|     |     |                          |                                                                                                                         |      |                                   |
|-----|-----|--------------------------|-------------------------------------------------------------------------------------------------------------------------|------|-----------------------------------|
| 250 | JBE |                          | An Extended Stakeholder Perspective in a Western Context"                                                               | 2008 | motivational typologies           |
|     |     |                          |                                                                                                                         |      | accountants and auditors          |
| 251 | JBE | Gerwin Van der Laan      | Corporate Social and Financial An Extended Performance: Stakeholder Theory and Empirical Test with Accounting Measures" | 2008 | panel data analysis               |
|     |     | Hans Van Ees             |                                                                                                                         |      | prospect decision theory          |
|     |     | Arjen Van Witteloostuijn |                                                                                                                         |      | resource dependence theory        |
|     |     |                          |                                                                                                                         |      | social responsibility             |
|     |     |                          |                                                                                                                         |      | stakeholder theory                |
| 252 | JBE | Abe Zakhem               | Stakeholder Management Capability: A Discourse–Theoretical Approach                                                     | 2008 | critical theory                   |
|     |     |                          |                                                                                                                         |      | discourse ethics                  |
|     |     |                          |                                                                                                                         |      | stakeholder management capability |
|     |     |                          |                                                                                                                         |      | stakeholder management theory     |
|     |     |                          |                                                                                                                         |      | communicative action              |
| 253 | JBE | Yves Fassin              | Imperfections and Shortcomings of the Stakeholder Model's Graphical Representation                                      | 2008 | Freeman's model                   |
|     |     |                          |                                                                                                                         |      | graphical framework               |
|     |     |                          |                                                                                                                         |      | stakeholder                       |
|     |     |                          |                                                                                                                         |      | stakeholder model                 |
|     |     |                          |                                                                                                                         |      | stakeholder reciprocity           |
|     |     |                          |                                                                                                                         |      | stakeholder theory                |
|     |     |                          |                                                                                                                         |      | strategy                          |

|     |     |                     |                                                                                                                                                                        |      |                                       |
|-----|-----|---------------------|------------------------------------------------------------------------------------------------------------------------------------------------------------------------|------|---------------------------------------|
| 254 | JBE | Pedro Francés-Gómez | Stakeholder's Preference and Rational Compliance: A Comment on Sacconi's "CSR as a Model for Extended Corporate Governance II: Compliance, Reputation and Reciprocity" | 2008 | Lorenzo Sacconi                       |
|     |     | Ariel del Rio       |                                                                                                                                                                        |      | social contract theory                |
|     |     |                     |                                                                                                                                                                        |      | CSR                                   |
|     |     |                     |                                                                                                                                                                        |      | evolutionary game theory              |
|     |     |                     |                                                                                                                                                                        |      | trust game                            |
| 255 | JBE | Julia Roloff        | Learning from Multi-Stakeholder Networks: Issue-Focussed Stakeholder Management                                                                                        | 2008 | stakeholder management                |
|     |     |                     |                                                                                                                                                                        |      | stakeholder dialogue                  |
|     |     |                     |                                                                                                                                                                        |      | multi-stakeholder network             |
|     |     |                     |                                                                                                                                                                        |      | deliberation                          |
|     |     |                     |                                                                                                                                                                        |      | conflict management                   |
|     |     |                     |                                                                                                                                                                        |      | corporate citizenship                 |
|     |     |                     |                                                                                                                                                                        |      | issue management                      |
|     |     |                     |                                                                                                                                                                        |      |                                       |
| 256 | JBE | Dima Jamali         | A Stakeholder Approach to Corporate Social Responsibility: A Fresh Perspective into Theory and Practice                                                                | 2008 | corporate social responsibility (CSR) |
|     |     |                     |                                                                                                                                                                        |      | stakeholder theory                    |
|     |     |                     |                                                                                                                                                                        |      | Lebanese and Syrian context           |
|     |     | Dirk Ulrich Gilbert |                                                                                                                                                                        |      | accountability standards              |
|     |     | Andreas Rasche      |                                                                                                                                                                        |      | compliance                            |



|     |     |                    |                                                                                                                       |      |                                 |
|-----|-----|--------------------|-----------------------------------------------------------------------------------------------------------------------|------|---------------------------------|
| 257 | JBE |                    | Opportunities and Problems of Standardized Ethics Initiatives – a Stakeholder Theory Perspective                      | 2008 | corporate accountability        |
|     |     |                    |                                                                                                                       |      | social audits                   |
|     |     |                    |                                                                                                                       |      | stakeholder theory              |
|     |     |                    |                                                                                                                       |      | stakeholder dialog              |
|     |     |                    |                                                                                                                       |      | ethical supply chains           |
| 258 | JBE | Vanessa Magness    | Who are the Stakeholders Now? An Empirical Examination of the Mitchell, Agle, and Wood Theory of Stakeholder Salience | 2008 | stakeholder theory              |
|     |     |                    |                                                                                                                       |      | corporate social responsibility |
|     |     |                    |                                                                                                                       |      | legitimacy perspective          |
| 259 | JBE | Barbara R. Bartkus | Do Firms Practice What They Preach? The Relationship Between Mission Statements and Stakeholder Management            | 2008 | diversity                       |
|     |     | Myron Glassman     |                                                                                                                       |      | environment                     |
|     |     |                    |                                                                                                                       |      | mission statement               |
|     |     |                    |                                                                                                                       |      | social issues                   |
|     |     |                    |                                                                                                                       |      | stakeholder management          |
| 260 | JBE | N. Sivakumar       | The Business Ethics of Jamsetji Nusserwanji Tata – A Forerunner in Promoting Stakeholder Welfare                      | 2008 | Jamsetji Nusserwanji Tata       |
|     |     |                    |                                                                                                                       |      | management history              |

|     |     |                 |                                                                                    |      |                                 |
|-----|-----|-----------------|------------------------------------------------------------------------------------|------|---------------------------------|
|     |     |                 |                                                                                    |      | stakeholder welfare             |
| 261 | JBE | Linda O’Riordan | Corporate Social Responsibility (CSR): Models and Theories in Stakeholder Dialogue | 2008 | corporate social responsibility |
|     |     |                 |                                                                                    |      | pharmaceutical industry         |
|     |     |                 |                                                                                    |      | stakeholders                    |
|     |     |                 |                                                                                    |      | stakeholder dialogue            |
| 262 | JBE | Yves Fassin     | The Stakeholder Model Refined                                                      | 2009 | stakeholder                     |
|     |     |                 |                                                                                    |      | stakewatcher                    |
|     |     |                 |                                                                                    |      | stakekeeper                     |
|     |     |                 |                                                                                    |      | stakeholder model               |
|     |     |                 |                                                                                    |      | stakeholder theory              |
|     |     |                 |                                                                                    |      | strategy                        |
|     |     |                 |                                                                                    |      | graphical framework             |
|     |     |                 |                                                                                    |      | Freeman’s model                 |
|     |     |                 |                                                                                    |      | pressure groups                 |
|     |     |                 |                                                                                    |      | business ethics                 |
|     |     | Amama Shaukat   |                                                                                    |      | Board of directors              |

|     |     |                      |                                                                                                                |      |                                       |
|-----|-----|----------------------|----------------------------------------------------------------------------------------------------------------|------|---------------------------------------|
| 263 | JBE | Yan Qiu              | Board Attributes, Corporate Social Responsibility Strategy, and Corporate Environmental and Social Performance | 2016 | Corporate governance                  |
|     |     | Grzegorz Trojanowski |                                                                                                                |      | Corporate social responsibility (CSR) |
|     |     |                      |                                                                                                                |      | Resource based view (RBV)             |
|     |     |                      |                                                                                                                |      | Resource dependence theory (RDT)      |
|     |     |                      |                                                                                                                |      | Structural equation modeling (SEM)    |
| 264 | JBE | MaryAnn Reynolds     | Moral Discourse and Corporate Social Responsibility Reporting                                                  | 2008 | stakeholder engagement                |
|     |     | Kristi Yuthas        |                                                                                                                |      | stakeholder reporting,                |
|     |     |                      |                                                                                                                |      | corporate social responsibility       |
|     |     |                      |                                                                                                                |      | discourse ethics                      |
|     |     |                      |                                                                                                                |      | relational stakeholder perspective    |
|     |     |                      |                                                                                                                |      | Theory of Communicative Action        |
| 265 | JBE | M. Joseph Sirgy      | Social Reporting by Companies Listed on the Alternative Investment Market                                      | 2008 | well-being marketing                  |
|     |     | Dong-Jin Lee         |                                                                                                                |      | marketing and quality of life         |
|     |     |                      |                                                                                                                |      | societal marketing                    |
|     |     |                      |                                                                                                                |      | marketing ethics                      |
|     |     |                      |                                                                                                                |      | social responsibility in marketing    |
|     |     | Niklas Egels-Zandén  |                                                                                                                |      | code of conduct                       |

|     |     |                    |                                                                                                                          |      |                                          |
|-----|-----|--------------------|--------------------------------------------------------------------------------------------------------------------------|------|------------------------------------------|
| 266 | JBE |                    | TNC Motives for Signing International Framework Agreements: A Continuous Bargaining Model of Stakeholder Pressure        | 2009 | corporate social responsibility          |
|     |     |                    |                                                                                                                          |      | international framework agreement        |
|     |     |                    |                                                                                                                          |      | labour practice                          |
|     |     |                    |                                                                                                                          |      | non-governmental organisation            |
|     |     |                    |                                                                                                                          |      | stakeholder                              |
|     |     |                    |                                                                                                                          |      | transnational corporation union          |
| 267 | JBE | Jocelyn D. Evans   | Business Ethics and the Decision to Adopt Golden Parachute Contracts: Empirical Evidence of Concern for All Stakeholders | 2009 | tender offers                            |
|     |     | Frank Hefner       |                                                                                                                          |      | mergers                                  |
|     |     |                    |                                                                                                                          |      | CEO executive pay                        |
|     |     |                    |                                                                                                                          |      | business ethics                          |
|     |     |                    |                                                                                                                          |      | organizational commitment                |
| 268 | JBE | Xiaohua Yang       | Antecedents of CSR Practices in MNCs' Subsidiaries: A Stakeholder and Institutional Perspective                          | 2009 | corporate social responsibility          |
|     |     | Cheryl Rivers      |                                                                                                                          |      | emerging economies                       |
|     |     |                    |                                                                                                                          |      | institutions                             |
|     |     |                    |                                                                                                                          |      | international                            |
|     |     |                    |                                                                                                                          |      | legitimacy                               |
|     |     |                    |                                                                                                                          |      | multinational corporations' subsidiaries |
|     |     |                    |                                                                                                                          |      | stakeholder                              |
| 269 | JBE | C. B. Bhattacharya | Strengthening Stakeholder–Company Relationships Through Mutually Beneficial Corporate Social                             | 2009 | corporate citizenship                    |
|     |     | Daniel Korschun    |                                                                                                                          |      | corporate social responsibility          |

|     |     |                      |                                                                                                                                                |      |                                      |
|-----|-----|----------------------|------------------------------------------------------------------------------------------------------------------------------------------------|------|--------------------------------------|
| 207 | JBE | Sankar Sen           | Through mutually beneficial Corporate Social Responsibility Initiatives                                                                        | 2007 | relationship marketing               |
|     |     |                      |                                                                                                                                                |      | stakeholder management               |
| 270 | JBE | Sybillle Sachs       | Toward Dynamic Corporate Stakeholder Responsibility                                                                                            | 2009 | corporate stakeholder responsibility |
|     |     | Marc Maurer          |                                                                                                                                                |      | CSR                                  |
|     |     |                      |                                                                                                                                                |      | distributive justice                 |
|     |     |                      |                                                                                                                                                |      | procedural justice                   |
|     |     |                      |                                                                                                                                                |      | stakeholder view                     |
|     |     |                      |                                                                                                                                                |      | wealth creation                      |
| 271 | JBE | Xiaomin Yu           | From Passive Beneficiary to Active Stakeholder: Workers' Participation in CSR Movement Against Labor Abuses"                                   | 2009 | codes of conduct                     |
|     |     |                      |                                                                                                                                                |      | corporate social responsibility      |
|     |     |                      |                                                                                                                                                |      | stakeholder                          |
|     |     |                      |                                                                                                                                                |      | worker participation                 |
|     |     |                      |                                                                                                                                                |      | China                                |
| 272 | JBE | Tiina Johanna Onkila | Corporate Argumentation for Acceptability: Reflections of Environmental Values and Stakeholder Relations in Corporate Environmental Statements | 2009 | acceptability                        |
|     |     |                      |                                                                                                                                                |      | argumentation                        |
|     |     |                      |                                                                                                                                                |      | corporate environmental management   |

|     |     |                |                                                          |      |                           |
|-----|-----|----------------|----------------------------------------------------------|------|---------------------------|
|     |     |                |                                                          |      | environmental values      |
|     |     |                |                                                          |      | stakeholder relations     |
| 273 | JBE | Michel Ferrary | A Stakeholder's Perspective on Human Resource Management | 2009 | human resource management |
|     |     |                |                                                          |      | industrial restructuring  |
|     |     |                |                                                          |      | political alliances       |
|     |     |                |                                                          |      | stakeholder theory        |
| 274 | JBE | J. Kaler       | An Optimally Viable Version of Stakeholder Theory        | 2009 | co-determination          |
|     |     |                |                                                          |      | competitive collaboration |
|     |     |                |                                                          |      | contributory principle    |
|     |     |                |                                                          |      | economic functioning      |
|     |     |                |                                                          |      | risk                      |
|     |     |                |                                                          |      | stakeholder               |
|     |     |                |                                                          |      | stockholder               |
|     |     |                |                                                          |      | work-related risk         |

|     |     |                    |                                                                                                                                        |      |                               |
|-----|-----|--------------------|----------------------------------------------------------------------------------------------------------------------------------------|------|-------------------------------|
| 275 | JBE | Elisabeth Garriga  | Cooperation in Stakeholder Networks: Firms' 'Tertius Iungens' Role                                                                     | 2009 | stakeholder networks          |
|     |     |                    |                                                                                                                                        |      | cooperation                   |
|     |     |                    |                                                                                                                                        |      | relational data               |
|     |     |                    |                                                                                                                                        |      | case study                    |
|     |     |                    |                                                                                                                                        |      | role of the firm              |
| 276 | JBE | Silvana Signori    | Ethical Thinking in Traditional Italian Economia Aziendale and the Stakeholder Management Theory: The Search for Possible Interactions | 2009 | azienda                       |
|     |     | Gianfranco Rusconi |                                                                                                                                        |      | business ethics               |
|     |     |                    |                                                                                                                                        |      | common good                   |
|     |     |                    |                                                                                                                                        |      | finalism                      |
|     |     |                    |                                                                                                                                        |      | stakeholder managerial theory |
|     |     | Carmelo Cennamo    |                                                                                                                                        |      | causal ambiguity              |
|     |     | Pascual Berrone    |                                                                                                                                        |      | corporate governance          |

|     |     |                     |                                                                |      |                                 |
|-----|-----|---------------------|----------------------------------------------------------------|------|---------------------------------|
| 277 | JBE | Luis R. Gomez-Mejia | Does Stakeholder Management have a Dark Side?                  | 2009 | managerial discretion           |
|     |     |                     |                                                                |      | stakeholder management          |
|     |     |                     |                                                                |      | stakeholder theory              |
| 278 | JBE | Eric W. Orts        | Putting a Stake in Stakeholder Theory                          | 2009 | corporate citizenship           |
|     |     | Alan Strudler       |                                                                |      | corporate governance            |
|     |     |                     |                                                                |      | corporate social responsibility |
|     |     |                     |                                                                |      | shareholder primacy             |
|     |     |                     |                                                                |      | social initiatives              |
|     |     |                     |                                                                |      | stakeholder theory              |
| 279 | JBE | Daniel Arenas       | The Role of NGOs in CSR: Mutual Perceptions Among Stakeholders | 2009 | stakeholder engagement          |
|     |     | Josep M. Lozano     |                                                                |      | CSR                             |
|     |     | Laura Albareda      |                                                                |      | NGOs                            |
|     |     |                     |                                                                |      | perceptions                     |
|     |     |                     |                                                                |      | legitimacy                      |



|     |     |                |                                                                                                                                   |      |                                            |
|-----|-----|----------------|-----------------------------------------------------------------------------------------------------------------------------------|------|--------------------------------------------|
|     |     |                |                                                                                                                                   |      | trade unions                               |
| 280 | JBE | James A. Stieb | Assessing Freeman's Stakeholder Theory                                                                                            | 2009 | R. E. Freeman                              |
|     |     |                |                                                                                                                                   |      | Milton Friedman                            |
|     |     |                |                                                                                                                                   |      | libertarianism                             |
|     |     |                |                                                                                                                                   |      | stakeholder theory                         |
|     |     |                |                                                                                                                                   |      | stakeholder management                     |
|     |     |                |                                                                                                                                   |      | stockholder theory                         |
| 281 | JBE | Marc A. Cohen  | The Narrow Application of Rawls in Business Ethics: A Political Conception of Both Stakeholder Theory and the Morality of Markets | 2010 | Rawls                                      |
|     |     |                |                                                                                                                                   |      | stakeholder theory (normative foundations) |
|     |     |                |                                                                                                                                   |      | social contract theory                     |
|     |     |                |                                                                                                                                   |      | Moral Markets approach                     |
|     |     |                |                                                                                                                                   |      | organizational ethics                      |
|     |     | Ataur R. Belal |                                                                                                                                   |      | corporate social reporting (CSRep)         |

|     |     |                     |                                                                                       |      |                           |
|-----|-----|---------------------|---------------------------------------------------------------------------------------|------|---------------------------|
| 282 | JBE | Robin W. Roberts    | Stakeholders' Perceptions of Corporate Social Reporting in Bangladesh                 | 2010 | stakeholders              |
|     |     |                     |                                                                                       |      | stakeholders' perceptions |
|     |     |                     |                                                                                       |      | accountability            |
|     |     |                     |                                                                                       |      | Bangladesh                |
| 283 | JBE | Joseph A. McKinney  | The Effects of Ethical Codes on Ethical Perceptions of Actions Toward Stakeholders    | 2010 | ethics codes              |
|     |     | Tisha L. Emerson    |                                                                                       |      | ethical attitudes         |
|     |     | Mitchell J. Neubert |                                                                                       |      |                           |
| 284 | JBE | Cheng-Li Huang      | Drivers of Environmental Disclosure and Stakeholder Expectation: Evidence from Taiwan | 2010 | environmental disclosure  |
|     |     | Fan-Hua Kung        |                                                                                       |      | stakeholder expectations  |
|     |     |                     |                                                                                       |      | stakeholder analysis      |
|     |     |                     |                                                                                       |      | environmental accounting  |

|     |     |                        |                                                                                            |      |                        |
|-----|-----|------------------------|--------------------------------------------------------------------------------------------|------|------------------------|
|     |     |                        |                                                                                            |      | disclosure strategy    |
|     |     |                        |                                                                                            |      | Taiwan                 |
| 285 | JBE | Eveline Bruijn         | That Which Doesn't Break Us: Identity Work by Local Indigenous 'Stakeholders'              | 2010 | Camisea                |
|     |     | Gail Whiteman          |                                                                                            |      | glocalization          |
|     |     |                        |                                                                                            |      | identity work          |
|     |     |                        |                                                                                            |      | Indigenous             |
|     |     |                        |                                                                                            |      | stakeholder relations  |
| 286 | JBE | Michelle Greenwood     | Trust and Stakeholder Theory: Trustworthiness in the Organisation–Stakeholder Relationship | 2010 | stakeholder theory     |
|     |     | Harry J. Van Buren III |                                                                                            |      | trust                  |
|     |     |                        |                                                                                            |      | trustworthiness        |
|     |     |                        |                                                                                            |      | power                  |
|     |     |                        |                                                                                            |      | dependent stakeholders |
|     |     | Grant T. Savage        |                                                                                            |      | Stakeholder Theory     |
|     |     | Michele D. Bunn        |                                                                                            |      | Stakeholder Practice   |

|     |     |                     |                                                                                                        |      |                            |
|-----|-----|---------------------|--------------------------------------------------------------------------------------------------------|------|----------------------------|
| 287 | JBE | Barbara Gray        | Stakeholder Collaboration: Implications for Stakeholder Theory and Practice                            | 2010 |                            |
|     |     | Qian Xiao           |                                                                                                        |      |                            |
|     |     | Sijun Wang          |                                                                                                        |      |                            |
|     |     | Elizabeth J. Wilson |                                                                                                        |      |                            |
|     |     | Eric S. Williams    |                                                                                                        |      |                            |
| 288 | JBE | Kalle Pajunen       | A “Black Box” of Stakeholder Thinking                                                                  | 2010 | Firm                       |
|     |     |                     |                                                                                                        |      | Emergence                  |
|     |     |                     |                                                                                                        |      | Models                     |
|     |     |                     |                                                                                                        |      | Stakeholder management     |
|     |     |                     |                                                                                                        |      | Stakeholder theory         |
| 289 | JBE | Matias Laine        | The Nature of Nature as a Stakeholder                                                                  | 2010 | Natural environment        |
|     |     |                     |                                                                                                        |      | Nature                     |
|     |     |                     |                                                                                                        |      | Stakeholder                |
| 290 | JBE | Oana Apostol        | Institutional Implications for Stakeholder Modelling: Looking at Institutions in a Centralised Economy | 2010 | Stakeholder model          |
|     |     | Salme Näsi          |                                                                                                        |      | Stakeholder identification |
|     |     |                     |                                                                                                        |      | Stakeholder salience       |
|     |     |                     |                                                                                                        |      | Institutional diversity    |
|     |     |                     |                                                                                                        |      | Centralised economy        |

|     |     |                   |                                                      |      |                          |
|-----|-----|-------------------|------------------------------------------------------|------|--------------------------|
| 291 | JBE | Duane Windsor     | The Role of Dynamics in Stakeholder Thinking         | 2010 | Change process           |
|     |     |                   |                                                      |      | Creative destruction     |
|     |     |                   |                                                      |      | Dialog                   |
|     |     |                   |                                                      |      | Dynamics                 |
|     |     |                   |                                                      |      | Engagement               |
|     |     |                   |                                                      |      | Networks                 |
|     |     |                   |                                                      |      | Participation            |
|     |     |                   |                                                      |      | Reciprocity              |
|     |     |                   |                                                      |      | Social construction      |
|     |     |                   |                                                      |      | Sustainability           |
|     |     |                   |                                                      |      | Value creation           |
|     |     |                   |                                                      |      |                          |
| 292 | JBE | Yves Fassin       | A Dynamic Perspective in Freeman's Stakeholder Model | 2010 | Activist                 |
|     |     |                   |                                                      |      | Dynamism                 |
|     |     |                   |                                                      |      | Graphical representation |
|     |     |                   |                                                      |      | NGO                      |
|     |     |                   |                                                      |      | Olympic Games            |
|     |     |                   |                                                      |      | Responsibility           |
|     |     |                   |                                                      |      | Stakeholder              |
|     |     |                   |                                                      |      | Stakeholder model        |
|     |     |                   |                                                      |      | Stakeholder theory       |
|     |     |                   |                                                      |      | Stakeseeker              |
|     |     |                   |                                                      |      | Stakewatcher             |
|     |     |                   |                                                      |      |                          |
|     |     | Päivi Myllykangas |                                                      |      | Stakeholder relationship |

|     |     |                          |                                                                                                                    |      |                      |
|-----|-----|--------------------------|--------------------------------------------------------------------------------------------------------------------|------|----------------------|
| 293 | JBE | Johanna Kujala           | Analyzing the Essence of Stakeholder Relationships: What do we Need in Addition to Power, Legitimacy, and Urgency? | 2010 | Saliency model       |
|     |     | Hanna Lehtimäki          |                                                                                                                    |      | Value creation       |
| 294 | JBE | Christopher J. Robertson | Stakeholder Perceptions of Offshoring and Outsourcing: The Role of Embedded Issues                                 | 2010 | offshoring           |
|     |     | Anna Lamin               |                                                                                                                    |      | outsourcing          |
|     |     | Grigorios Livanis        |                                                                                                                    |      | internationalization |
|     |     |                          |                                                                                                                    |      | ethics               |
|     |     |                          |                                                                                                                    |      | moral intensity      |
|     |     |                          |                                                                                                                    |      | product quality      |
|     |     |                          |                                                                                                                    |      | information security |
|     |     | Eleanor R.E. O'Higgins   |                                                                                                                    |      | stakeholders         |

|     |     |                            |                                                                                                |      |                                     |
|-----|-----|----------------------------|------------------------------------------------------------------------------------------------|------|-------------------------------------|
| 295 | JBE |                            | Corporations, Civil Society, and Stakeholders: An Organizational Conceptualization             | 2010 | corporate social responsibility     |
|     |     |                            |                                                                                                |      | organizational configurations       |
| 296 | JBE | José A. Plaza-Úbeda        | Measuring Stakeholder Integration: Knowledge, Interaction and Adaptational Behavior Dimensions | 2010 | stakeholder integration             |
|     |     | Jerónimo de Burgos-Jiménez |                                                                                                |      | stakeholder management              |
|     |     | Eva Carmona-Moreno         |                                                                                                |      | stakeholder theory                  |
|     |     |                            |                                                                                                |      | stakeholder integration measurement |
| 297 | JBE | Haesun Park-Poaps          | Stakeholder Forces of Socially Responsible Supply Chain Management Orientation                 | 2010 | supply chain                        |
|     |     | Kathleen Rees              |                                                                                                |      | clothing                            |
|     |     |                            |                                                                                                |      | sweatshop                           |

|     |     |                     |                                                                                                                            |      |                                        |
|-----|-----|---------------------|----------------------------------------------------------------------------------------------------------------------------|------|----------------------------------------|
|     |     |                     |                                                                                                                            |      | social responsibility                  |
| 298 | JBE | D. A. Vazquez-Brust | Stakeholders Pressures and Strategic Prioritisation: An Empirical Analysis of Environmental Responses in Argentinean Firms | 2010 | corporate social responsibility        |
|     |     | C. Liston-Heyes     |                                                                                                                            |      | environmental management               |
|     |     | J. A. Plaza-Úbeda   |                                                                                                                            |      | environmental strategy                 |
|     |     | J. Burgos-Jiménez   |                                                                                                                            |      | stakeholder management                 |
|     |     |                     |                                                                                                                            |      | stakeholder pressures                  |
| 299 | JBE | Joyce Tsoi          | Stakeholders' Perceptions and Future Scenarios to Improve Corporate Social Responsibility in Hong Kong and Mainland China" | 2010 | corporate social responsibility        |
|     |     |                     |                                                                                                                            |      | stakeholder perception and expectation |
|     |     |                     |                                                                                                                            |      | future scenarios                       |
|     |     |                     |                                                                                                                            |      | supply chain                           |
|     |     |                     |                                                                                                                            |      | Hong Kong                              |



|     |     |                     |                                                                                                      |      |                                           |
|-----|-----|---------------------|------------------------------------------------------------------------------------------------------|------|-------------------------------------------|
|     |     |                     |                                                                                                      |      | Mainland China                            |
| 300 | JBE | Angeloantonio Russo | Investigating Stakeholder Theory and Social Capital: CSR in Large Firms and SMEs                     | 2010 | corporate social responsibility (CSR)     |
|     |     | Francesco Perrini   |                                                                                                      |      | idiosyncrasies                            |
|     |     |                     |                                                                                                      |      | small and medium-sized enterprises (SMEs) |
|     |     |                     |                                                                                                      |      | social capital                            |
|     |     |                     |                                                                                                      |      | stakeholder theory                        |
| 301 | JBE | Humphry Hung        | Directors' Roles in Corporate Social Responsibility: A Stakeholder Perspective                       | 2011 | corporate directors                       |
|     |     |                     |                                                                                                      |      | corporate social responsibility roles     |
|     |     |                     |                                                                                                      |      | stakeholders                              |
| 302 | JBE | Benjamin A. Neville | Stakeholder Saliency Revisited: Refining Redefining and Refueling an Underdeveloped Conceptual Tool" | 2011 | legitimacy                                |
|     |     | Simon J. Bell       |                                                                                                      |      | stakeholder identification                |
|     |     | Gregory J. Whitwell |                                                                                                      |      | stakeholder saliency                      |

|     |     |                    |                                                                                                                                           |      |                                 |
|-----|-----|--------------------|-------------------------------------------------------------------------------------------------------------------------------------------|------|---------------------------------|
|     |     |                    |                                                                                                                                           |      | power                           |
|     |     |                    |                                                                                                                                           |      | urgency                         |
| 303 | JBE | Min-Dong Paul Lee  | Configuration of External Influences: The Combined Effects of Institutions and Stakeholders on Corporate Social Responsibility Strategies | 2011 | corporate social responsibility |
|     | JBE |                    |                                                                                                                                           |      | institutional theory            |
|     | JBE |                    |                                                                                                                                           |      | stakeholder theory              |
|     | JBE |                    |                                                                                                                                           |      | corporate social strategy       |
| 304 | JBE | André Habisch      | Different Talks with Different Folks: A Comparative Survey of Stakeholder Dialog in Germany Italy and the U.S."                           | 2011 | stakeholder dialog              |
|     |     | Lorenzo Patelli    |                                                                                                                                           |      | sustainability reporting        |
|     |     | Matteo Pedrini     |                                                                                                                                           |      | corporate social responsibility |
|     |     | Christoph Schwartz |                                                                                                                                           |      | international study             |
|     |     | Andrew Crane       |                                                                                                                                           |      | Corporate responsibility        |

|     |     |                    |                                                                                                                                                                          |      |                                               |
|-----|-----|--------------------|--------------------------------------------------------------------------------------------------------------------------------------------------------------------------|------|-----------------------------------------------|
| 305 | JBE | Trish Ruebottom    | Stakeholder Theory and Social Identity: Rethinking Stakeholder Identification                                                                                            | 2011 | Identity salience                             |
|     |     |                    |                                                                                                                                                                          |      | Social identity theory                        |
|     |     |                    |                                                                                                                                                                          |      | Stakeholder identification and classification |
|     |     |                    |                                                                                                                                                                          |      | Stakeholder theory                            |
| 306 | JBE | Don Clifton        | The Stakeholder Approach: A Sustainability Perspective                                                                                                                   | 2011 | stakeholders                                  |
|     |     | Azlan Amran        |                                                                                                                                                                          |      | stakeholder approach                          |
|     |     |                    |                                                                                                                                                                          |      | sustainability                                |
|     |     |                    |                                                                                                                                                                          |      | sustainable world                             |
|     |     |                    |                                                                                                                                                                          |      | sustaining corporation                        |
| 307 | JBE | Les Coleman        | Losses from Failure of Stakeholder Sensitive Processes: Financial Consequences for Large US Companies from Breakdowns in Product Environmental and Accounting Standards" | 2011 | ESG                                           |
|     |     |                    |                                                                                                                                                                          |      | ethics                                        |
|     |     |                    |                                                                                                                                                                          |      | behavioral corporate finance                  |
|     |     |                    |                                                                                                                                                                          |      | stakeholder risk                              |
|     |     | Kevin S. Groves    |                                                                                                                                                                          |      | Corporate social responsibility               |
|     |     | Michael A. LaRocca |                                                                                                                                                                          |      | Organizational citizenship behaviors          |

|     |     |                       |                                                                                                                                                    |      |                                       |
|-----|-----|-----------------------|----------------------------------------------------------------------------------------------------------------------------------------------------|------|---------------------------------------|
| 308 | JBE |                       | Responsible Leadership Outcomes Via Stakeholder CSR<br>Values: Testing a Values-Centered Model of<br>Transformational Leadership                   | 2011 | Responsible leadership                |
|     |     |                       |                                                                                                                                                    |      | Stakeholder values                    |
|     |     |                       |                                                                                                                                                    |      | Transformational leadership           |
|     |     |                       |                                                                                                                                                    |      | Values congruence                     |
| 309 | JBE | Michaela A. Balzarova | Stakeholders' Influence and Contribution to Social<br>Standards Development: The Case of Multiple Stakeholder<br>Approach to ISO 26000 Development | 2012 | Production and evolution of standards |
|     |     | Pavel Castka          |                                                                                                                                                    |      | Social responsibility                 |
|     |     |                       |                                                                                                                                                    |      | Environmental responsibility          |
|     |     |                       |                                                                                                                                                    |      | ISO 26000                             |
|     |     |                       |                                                                                                                                                    |      | Stakeholders                          |
| 310 | JBE | Robbin Derry          | Reclaiming Marginalized Stakeholders                                                                                                               | 2012 | Business ethics                       |
|     |     |                       |                                                                                                                                                    |      | Separation Thesis                     |
|     |     |                       |                                                                                                                                                    |      | Stakeholder theory                    |

|     |     |                           |                                                                                                                                                  |      |                                 |
|-----|-----|---------------------------|--------------------------------------------------------------------------------------------------------------------------------------------------|------|---------------------------------|
|     |     |                           |                                                                                                                                                  |      | Stakeholder typology            |
| 311 | JBE | Luis A. Perez-Batres      | Stakeholder Pressures as Determinants of CSR Strategic Choice: Why do Firms Choose Symbolic Versus Substantive Self-Regulatory Codes of Conduct? | 2012 | CSR                             |
|     |     | Jonathan P. Doh           |                                                                                                                                                  |      | Voluntary codes of conduct      |
|     |     | Van V. Miller             |                                                                                                                                                  |      | Stakeholder pressures           |
|     |     | Michael J. Pisani         |                                                                                                                                                  |      | KLD                             |
|     |     |                           |                                                                                                                                                  |      | SD                              |
|     |     |                           |                                                                                                                                                  |      | Pollution-intensive industries  |
|     |     |                           |                                                                                                                                                  |      | Resource discretion             |
| 312 | JBE | Yves Fassin               | Stakeholder Management, Reciprocity and Stakeholder Responsibility                                                                               | 2012 | Stakeholder                     |
|     |     |                           |                                                                                                                                                  |      | Stakeholder management          |
|     |     |                           |                                                                                                                                                  |      | Stakeholder theory              |
|     |     |                           |                                                                                                                                                  |      | Corporate social responsibility |
|     |     |                           |                                                                                                                                                  |      | Business ethics                 |
|     |     |                           |                                                                                                                                                  |      | Corporate governance            |
|     |     |                           |                                                                                                                                                  |      | Fairness                        |
|     |     |                           |                                                                                                                                                  |      | Reciprocity                     |
|     |     |                           |                                                                                                                                                  |      | Stakeowner                      |
| 313 | JBE | Hans-Jörg Schlierer       | How Do European SME Owner–Managers Make Sense of ‘Stakeholder Management’?: Insights from a Cross-                                               | 2012 | Comparative research            |
|     |     | Silvana Signori           |                                                                                                                                                  |      | Language                        |
|     |     | Elisabeth Garriga         |                                                                                                                                                  |      | National business environments  |
|     |     | Heidi von Weltzien Hoivik |                                                                                                                                                  |      | Sensemaking                     |

|     |     |                   |                                                                                                         |      |                                     |
|-----|-----|-------------------|---------------------------------------------------------------------------------------------------------|------|-------------------------------------|
|     |     | Andrea Werner     | National Study                                                                                          |      | Small- and medium-sized enterprises |
|     |     | Annick Van Rossem |                                                                                                         |      | Small business                      |
|     |     | Yves Fassin       |                                                                                                         |      | Stakeholder management              |
|     |     |                   |                                                                                                         |      |                                     |
| 314 | JBE | Mario Minoja      | Stakeholder Management Theory, Firm Strategy, and Ambidexterity                                         | 2012 | Ambidexterity                       |
|     |     |                   |                                                                                                         |      | Dynamic approach                    |
|     |     |                   |                                                                                                         |      | Ethics                              |
|     |     |                   |                                                                                                         |      | Firm strategy                       |
|     |     |                   |                                                                                                         |      | Integration                         |
|     |     |                   |                                                                                                         |      | Stakeholder management              |
| 315 | JBE | Johanna Kujala    | Understanding the Nature of Stakeholder Relationships: An Empirical Examination of a Conflict Situation | 2012 | Stakeholder relationships           |
|     |     | Anna Heikkinen    |                                                                                                         |      | Business ethics                     |
|     |     | Hanna Lehtimäki   |                                                                                                         |      | Stakeholder salience                |
|     |     |                   |                                                                                                         |      | Foreign investment                  |
|     |     |                   |                                                                                                         |      | Strategy                            |
| 316 | JBE | Kevin Gibson      | Stakeholders and Sustainability: An Evolving Theory                                                     | 2012 | Stakeholder                         |
|     |     |                   |                                                                                                         |      | Sustainability                      |
|     |     |                   |                                                                                                         |      | Environment                         |
|     |     |                   |                                                                                                         |      | Nature                              |

|     |     |                           |                                                                                                            |      |                                 |
|-----|-----|---------------------------|------------------------------------------------------------------------------------------------------------|------|---------------------------------|
|     |     |                           |                                                                                                            |      | Responsibility                  |
|     |     |                           |                                                                                                            |      | Management                      |
| 317 | JBE | Jose Maria Lopez-De-Pedro | Stakeholder Approach: What Effects Should We Take into Account in Contemporary Societies?                  | 2012 | Stakeholder approach            |
|     |     | Eva Rimbau-Gilabert       |                                                                                                            |      | Effects                         |
|     |     |                           |                                                                                                            |      | Relationships                   |
|     |     |                           |                                                                                                            |      | Corporate responsibility        |
|     |     |                           |                                                                                                            |      | Contemporary societies          |
| 318 | JBE | Adele Santana             | Three Elements of Stakeholder Legitimacy                                                                   | 2012 | Organizational legitimacy       |
|     |     |                           |                                                                                                            |      | Stakeholder behavior            |
|     |     |                           |                                                                                                            |      | Stakeholder claim               |
|     |     |                           |                                                                                                            |      | Stakeholder legitimacy          |
|     |     |                           |                                                                                                            |      | Stakeholder theory              |
|     |     |                           |                                                                                                            |      | Stakeholder attributes          |
| 319 | JBE | Suman Sen                 | The Relevance of Stakeholder Theory and Social Capital Theory in the Context of CSR in SMEs: An Australian | 2013 | Corporate social responsibility |
|     |     | James Cowley              |                                                                                                            |      | Small and medium enterprises    |

|     |     |                       |                                                                                                        |      |                               |
|-----|-----|-----------------------|--------------------------------------------------------------------------------------------------------|------|-------------------------------|
| 319 | JBE |                       | Theory in the Context of CSR in SMEs: An Australian Perspective                                        | 2013 | Social capital theory         |
|     |     |                       |                                                                                                        |      | Stakeholder theory            |
| 320 | JBE | Valentina Mele        | E Pluribus Unum? Legitimacy Issues and Multi-stakeholder Codes of Conduct                              | 2013 | Multi-stakeholder codes       |
|     |     | Donald H. Schepers    |                                                                                                        |      | Voluntary codes               |
|     |     |                       |                                                                                                        |      | United Nations Global Compact |
|     |     |                       |                                                                                                        |      | Stakeholder legitimacy        |
| 321 | JBE | Maria Besiou          | A Web of Watchdogs: Stakeholder Media Networks and Agenda-Setting in Response to Corporate Initiatives | 2013 | Agenda-setting                |
|     |     | Mark Lee Hunter       |                                                                                                        |      | Media                         |
|     |     | Luk N. Van Wassenhove |                                                                                                        |      | Stakeholder                   |
|     |     |                       |                                                                                                        |      | Stakeholder media             |
|     |     |                       |                                                                                                        |      | System dynamics               |
|     |     | Robert Strand         |                                                                                                        |      | Cooperative advantage         |
|     |     | R. Edward Freeman     |                                                                                                        |      | Scandinavia                   |



|     |     |                            |                                                                                                                                |      |                                    |
|-----|-----|----------------------------|--------------------------------------------------------------------------------------------------------------------------------|------|------------------------------------|
| 322 | JBE |                            | Scandinavian Cooperative Advantage: The Theory and Practice of Stakeholder Engagement in Scandinavia                           | 2013 | Stakeholder theory                 |
|     |     |                            |                                                                                                                                |      | Strategic management               |
|     |     |                            |                                                                                                                                |      | Sustainability                     |
|     |     |                            |                                                                                                                                |      | Creating shared value              |
| 323 | JBE | Deborah E. de Lange        | How do Universities Make Progress? Stakeholder-Related Mechanisms Affecting Adoption of Sustainability in University Curricula | 2013 | Adoption                           |
|     |     |                            |                                                                                                                                |      | Institutional theory               |
|     |     |                            |                                                                                                                                |      | Responsible leader organization    |
|     |     |                            |                                                                                                                                |      | Stakeholder theory                 |
|     |     |                            |                                                                                                                                |      | Universities                       |
|     |     |                            |                                                                                                                                |      | Sustainability                     |
| 324 | JBE | Jacob Brower               | Driven to Be Good: A Stakeholder Theory Perspective on the Drivers of Corporate Social Performance                             | 2013 | Corporate social performance (CSP) |
|     |     | Vijay Mahajan              |                                                                                                                                |      | KLD database                       |
|     |     |                            |                                                                                                                                |      | Stakeholder theory                 |
|     |     | Deborah Vidaver-CohenPeggy |                                                                                                                                |      | Corporate reputation               |
|     |     | Simcic Brønn               |                                                                                                                                |      | Corporate responsibility           |

|     |     |                   |                                                                                                                     |      |                                     |
|-----|-----|-------------------|---------------------------------------------------------------------------------------------------------------------|------|-------------------------------------|
| 325 | JBE |                   | Reputation, Responsibility, and Stakeholder Support in Scandinavian Firms: A Comparative Analysis                   | 2013 | CSR                                 |
|     |     |                   |                                                                                                                     |      | Corporate citizenship               |
|     |     |                   |                                                                                                                     |      | Corporate governance                |
|     |     |                   |                                                                                                                     |      | Leadership                          |
|     |     |                   |                                                                                                                     |      | Ethics                              |
|     |     |                   |                                                                                                                     |      | Business ethics                     |
|     |     |                   |                                                                                                                     |      | Corporate social responsibility     |
|     |     |                   |                                                                                                                     |      | Moral climate                       |
|     |     |                   |                                                                                                                     |      | Reputation theory                   |
|     |     |                   |                                                                                                                     |      | Scandinavia                         |
|     |     |                   |                                                                                                                     |      | Servant leadership                  |
|     |     |                   |                                                                                                                     |      |                                     |
| 326 | JBE | Tommy Jensen      | In Defence of Stakeholder Pragmatism                                                                                | 2013 | Defence industry                    |
|     |     | Johan Sandström   |                                                                                                                     |      | Ethics                              |
|     |     |                   |                                                                                                                     |      | Separation thesis                   |
|     |     |                   |                                                                                                                     |      | Stakeholder theory                  |
|     |     |                   |                                                                                                                     |      | Pragmatism                          |
| 327 | JBE | Christine Mallin  | Monitoring Intensity and Stakeholders' Orientation: How Does Governance Affect Social and Environmental Disclosure? | 2013 | Corporate governance                |
|     |     | Giovanna Michelin |                                                                                                                     |      | Corporate social responsibility     |
|     |     | Davide Raggi      |                                                                                                                     |      | Social and environmental disclosure |
|     |     |                   |                                                                                                                     |      | Monitoring                          |

|     |     |               |                                                                                                               |      |                                 |
|-----|-----|---------------|---------------------------------------------------------------------------------------------------------------|------|---------------------------------|
|     |     |               |                                                                                                               |      | Structural equation modeling    |
| 328 | JBE | Jon Burchell  | Sleeping with the Enemy? Strategic Transformations in Business–NGO Relationships Through Stakeholder Dialogue | 2013 | Corporate social responsibility |
|     |     | Joanne Cook   |                                                                                                               |      | Stakeholder dialogue            |
|     |     |               |                                                                                                               |      | Business–NGOs relationships     |
| 329 | JBE | Alain Verbeke | The Future of Stakeholder Management Theory: A Temporal Perspective                                           | 2013 | Competitive advantage           |
|     |     | Vincent Tung  |                                                                                                               |      | Institutional theory            |
|     |     |               |                                                                                                               |      | Resource-based view             |

|     |     |                          |                                                                                                     |      |                                       |
|-----|-----|--------------------------|-----------------------------------------------------------------------------------------------------|------|---------------------------------------|
|     |     |                          |                                                                                                     |      | Stakeholder management theory         |
|     |     |                          |                                                                                                     |      |                                       |
| 330 | JBE | Linda O’Riordan          | Managing CSR Stakeholder Engagement: A New Conceptual Framework                                     | 2014 | CSR                                   |
|     |     | Jenny Fairbrass          |                                                                                                     |      | Stakeholder management                |
|     |     |                          |                                                                                                     |      | Stakeholder engagement                |
|     |     |                          |                                                                                                     |      | Conceptual frameworks                 |
|     |     |                          |                                                                                                     |      | Pharmaceutical industry               |
|     |     |                          |                                                                                                     |      | UK and Germany                        |
| 331 | JBE | Belen Fernandez-Feijoo   | Effect of Stakeholders’ Pressure on Transparency of Sustainability Reports within the GRI Framework | 2014 | Corporate social responsibility       |
|     |     | Silvia RomeroSilvia Ruiz |                                                                                                     |      | Global Reporting Initiative           |
|     |     |                          |                                                                                                     |      | Information system for sustainability |
|     |     |                          |                                                                                                     |      | Stakeholders pressure                 |

|     |     |                                      |                                                                                                            |      |                                      |
|-----|-----|--------------------------------------|------------------------------------------------------------------------------------------------------------|------|--------------------------------------|
|     |     |                                      |                                                                                                            |      | Sustainability report                |
|     |     |                                      |                                                                                                            |      | Transparency                         |
| 332 | JBE | Andrea Pérez                         | Corporate Reputation in The Spanish Context: An Interaction Between Reporting to Stakeholders and Industry | 2014 | Corporate social responsibility      |
|     |     | María del Mar García de los Salmones |                                                                                                            |      | Reputation                           |
|     |     | Carlos López                         |                                                                                                            |      | Reporting                            |
|     |     |                                      |                                                                                                            |      | Industry                             |
|     |     |                                      |                                                                                                            |      | Stakeholders                         |
| 333 | JBE | Elisabeth Garriga                    | Beyond Stakeholder Utility Function: Stakeholder Capability in the Value Creation Process                  | 2014 | Stakeholder theory                   |
|     |     |                                      |                                                                                                            |      | Value creation                       |
|     |     |                                      |                                                                                                            |      | Empirical model                      |
|     |     |                                      |                                                                                                            |      | Amartya Sen                          |
|     |     |                                      |                                                                                                            |      | Capabilities                         |
|     |     |                                      |                                                                                                            |      | Corporate Social Responsibility      |
|     |     | Julia Wolf                           |                                                                                                            |      | Corporate sustainability performance |
|     |     |                                      |                                                                                                            |      | Stakeholder pressure                 |

|     |     |                        |                                                                                                                             |      |                            |
|-----|-----|------------------------|-----------------------------------------------------------------------------------------------------------------------------|------|----------------------------|
| 334 | JBE |                        | The Relationship Between Sustainable Supply Chain Management, Stakeholder Pressure and Corporate Sustainability Performance | 2014 | Sustainable development    |
|     |     |                        |                                                                                                                             |      | Supply chain management    |
|     |     |                        |                                                                                                                             |      | Regression                 |
| 335 | JBE | Elise Perrault         | A 'Names-and-Faces Approach' to Stakeholder Identification and Salience: A Matter of Status                                 | 2015 | Stakeholder theory ∩       |
|     |     |                        |                                                                                                                             |      | Stakeholder management     |
|     |     |                        |                                                                                                                             |      | Status                     |
|     |     |                        |                                                                                                                             |      | ∩ Social identity          |
|     |     |                        |                                                                                                                             |      | Stakeholder identification |
| 336 | JBE | Jose-Luis Godos-Díez   | Business Education and Idealism as Determinants of Stakeholder Orientation                                                  | 2015 | Business education         |
|     |     | Roberto Fernández-Gago |                                                                                                                             |      | Idealism                   |
|     |     | Laura Cabeza-García    |                                                                                                                             |      | Stakeholder management     |
|     |     |                        |                                                                                                                             |      | Instrumental orientation   |

|     |     |                         |                                                                                                           |      |                                 |
|-----|-----|-------------------------|-----------------------------------------------------------------------------------------------------------|------|---------------------------------|
|     |     |                         |                                                                                                           |      | Normative orientation           |
| 337 | JBE | Hannes Hofmann          | Conflict Minerals and Supply Chain Due Diligence:<br>An Exploratory Study of Multi-tier Supply Chains     | 2015 | Exploratory case study          |
|     |     | Martin C. Schleper      |                                                                                                           |      | Conflict minerals               |
|     |     | Constantin Blome        |                                                                                                           |      | Corporate social responsibility |
|     |     |                         |                                                                                                           |      | Dynamic capabilities            |
|     |     |                         |                                                                                                           |      | Supply chain due diligence      |
|     |     |                         |                                                                                                           |      | Standards                       |
|     |     |                         |                                                                                                           |      | Supply chain management         |
| 338 | JBE | Laura Illia             | Exploring Corporations' Dialogue About CSR in the<br>Digital Era                                          | 2015 | CSR                             |
|     |     | Stefania Romenti        |                                                                                                           |      | Online                          |
|     |     | Belén Rodríguez-Cánovas |                                                                                                           |      | Openness                        |
|     |     | Grazia Murtarelli       |                                                                                                           |      | Dialogue                        |
|     |     | Craig E. Carroll        |                                                                                                           |      | Communication                   |
| 339 | JBE | Marjo Siltaoja          | From Rationality to Emotionally Embedded Relations:<br>Envy as a Signal of Power in Stakeholder Relations | 2015 | Discourse                       |
|     |     | Merja Lähdesmäki        |                                                                                                           |      | Emotion                         |
|     |     |                         |                                                                                                           |      | Envy                            |
|     |     |                         |                                                                                                           |      | Relationships                   |
|     |     |                         |                                                                                                           |      | Salience                        |
|     |     |                         |                                                                                                           |      | Small business                  |

|     |     |                    |                                                                                                  |      |                                 |
|-----|-----|--------------------|--------------------------------------------------------------------------------------------------|------|---------------------------------|
|     |     |                    |                                                                                                  |      | Stakeholder                     |
| 340 | JBE | Nicolas M. Dahan   | Pivoting the Role of Government in the Business and Society Interface: A Stakeholder Perspective | 2015 | Stakeholder theory              |
|     |     | Jonathan P. Doh    |                                                                                                  |      | Government                      |
|     |     | Jonathan D. Raelin |                                                                                                  |      | Citizens                        |
|     |     |                    |                                                                                                  |      | Salience                        |
| 341 | JBE | Thomas Thijssens   | Secondary Stakeholder Influence on CSR Disclosure: An Application of Stakeholder Salience Theory | 2015 | Stakeholder salience theory     |
|     |     | Laury Bollen       |                                                                                                  |      | CSR disclosure                  |
|     |     | Harold Hassink     |                                                                                                  |      | Corporate Social Responsibility |
|     |     |                    |                                                                                                  |      | Environmental NGOs              |
|     |     |                    |                                                                                                  |      | Environmental reporting         |
| 342 | JBE | Jung Wan Lee       | Antecedents of Adopting Corporate Environmental Responsibility and Green Practices               | 2016 | Corporate social responsibility |
|     |     | Young Min Kim      |                                                                                                  |      | Environmental responsibility    |
|     |     | Young Ei Kim       |                                                                                                  |      | Green practices                 |
|     |     |                    |                                                                                                  |      | Logistics industry              |



|     |     |                      |                                                                                                                                   |      |                                       |
|-----|-----|----------------------|-----------------------------------------------------------------------------------------------------------------------------------|------|---------------------------------------|
|     |     |                      |                                                                                                                                   |      | Organizational support                |
|     |     |                      |                                                                                                                                   |      | Social expectations                   |
|     |     |                      |                                                                                                                                   |      | Stakeholder pressure                  |
| 343 | JBE | Mohammed Benlemlih   | Corporate Social Responsibility and Investment Efficiency                                                                         | 2016 | Corporate social responsibility       |
|     |     | Mohammad Bitar       |                                                                                                                                   |      | Corporate governance                  |
|     |     |                      |                                                                                                                                   |      | Investment efficiency                 |
|     |     |                      |                                                                                                                                   |      | Stakeholders theory                   |
| 344 | JBE | Se-Yeon Ahn          | Corporate Social Responsibility and Corporate Longevity:<br>The Mediating Role of Social Capital and Moral<br>Legitimacy in Korea | 2016 | Corporate longevity                   |
|     |     | Dong-Jun Park        |                                                                                                                                   |      | Social capital                        |
|     |     |                      |                                                                                                                                   |      | Corporate social responsibility       |
|     |     |                      |                                                                                                                                   |      | Moral legitimacy                      |
| 345 | JBE | Amama Shaukat        | Board Attributes, Corporate Social Responsibility Strategy,<br>and Corporate Environmental and Social Performance                 | 2016 | Board of directors                    |
|     |     | Yan Qiu              |                                                                                                                                   |      | Corporate governance                  |
|     |     | Grzegorz Trojanowski |                                                                                                                                   |      | Corporate social responsibility (CSR) |
|     |     |                      |                                                                                                                                   |      | Resource based view (RBV)             |

|     |     |                          |                                                                                                          |      |                                        |
|-----|-----|--------------------------|----------------------------------------------------------------------------------------------------------|------|----------------------------------------|
|     |     |                          |                                                                                                          |      | Resource dependence theory (RDT)       |
|     |     |                          |                                                                                                          |      | Structural equation modeling (SEM)     |
| 346 | JBE | Iftekhar Hasan           | Corporate Social Responsibility and Firm Financial Performance: The Mediating Role of Productivity       | 2016 | Corporate social responsibility        |
|     |     | Nada Kobeissi            |                                                                                                          |      | Corporate financial performance        |
|     |     | Liuling Liu              |                                                                                                          |      | Total factor productivity              |
|     |     | Haizhi Wang              |                                                                                                          |      | Stakeholder management                 |
|     |     |                          |                                                                                                          |      | Discretionary cash Organizational risk |
| 347 | JBE | Shih-Chi Chiu            | Corporate Social Irresponsibility and Executive Succession: An Empirical Examination                     | 2016 | Corporate social responsibility        |
|     |     | Mark Sharfman            |                                                                                                          |      | Executive turnover                     |
|     |     |                          |                                                                                                          |      | Chief executive officer                |
|     |     |                          |                                                                                                          |      | Succession                             |
|     |     |                          |                                                                                                          |      | Firm visibility                        |
|     |     |                          |                                                                                                          |      | Dynamism                               |
|     |     |                          |                                                                                                          |      | Dismissal                              |
|     |     |                          |                                                                                                          |      | Successor origin                       |
| 348 | JBE | Sylvia Maxfield          | The Effectiveness of Bank Governance Reforms in the Wake of the Financial Crisis: A Stakeholder Approach | 2016 | Financial sector reform                |
|     |     | Liu Wang                 |                                                                                                          |      | Corporate governance                   |
|     |     | Mariana Magaldi de Sousa |                                                                                                          |      | Credit provision                       |
|     |     |                          |                                                                                                          |      | Net interest margin                    |
|     |     |                          |                                                                                                          |      | Stakeholder theory                     |
|     |     | Irene M. Herremans       |                                                                                                          |      | Resource dependence                    |

|     |     |                      |                                                                                               |      |                                    |
|-----|-----|----------------------|-----------------------------------------------------------------------------------------------|------|------------------------------------|
| 349 | JBE | Jamal A. Nazari      | Stakeholder Relationships, Engagement, and Sustainability Reporting                           | 2016 | Stakeholder engagement             |
|     |     | Fereshteh Mahmoudian |                                                                                               |      | Stakeholder relationships          |
|     |     |                      |                                                                                               |      | Sustainability reporting           |
| 350 | JBE | Birte Schaltenbrand  | See What We Want to See? The Effects of Managerial Experience on Corporate Green Investments  | 2016 | Corporate sustainability           |
|     |     | Kai Foerst           |                                                                                               |      | Green investments                  |
|     |     | Arash Azadegan       |                                                                                               |      | Survey research                    |
|     |     | Kevin Lindeman       |                                                                                               |      | Managerial cognition and reasoning |
|     |     |                      |                                                                                               |      | Vignette-based experiments         |
| 351 | JBE | Daniel Arenas        | On Firms and the Next Generations: Difficulties and Possibilities for Business Ethics Inquiry | 2016 | Future generations                 |
|     |     | Pablo Rodrigo        |                                                                                               |      | Intergenerational justice          |
|     |     |                      |                                                                                               |      | Sustainability                     |
|     |     |                      |                                                                                               |      | Special responsibilities           |
|     |     |                      |                                                                                               |      | Stakeholder theory                 |

|     |     |                          |                                                                                                                            |      |                        |
|-----|-----|--------------------------|----------------------------------------------------------------------------------------------------------------------------|------|------------------------|
|     |     |                          |                                                                                                                            |      | Indirect reciprocity   |
|     |     |                          |                                                                                                                            |      | Narratives             |
| 352 | JBE | Sefa Hayibor             | Motivators of Mobilization                                                                                                 | 2016 | Equity theory          |
|     |     | Colleen Collins          |                                                                                                                            |      | Expectancy theory      |
|     |     |                          |                                                                                                                            |      | Fairness               |
|     |     |                          |                                                                                                                            |      | Resource dependence    |
|     |     |                          |                                                                                                                            |      | Stakeholder action     |
|     |     |                          |                                                                                                                            |      | Stakeholder theory     |
| 353 | JBE | Jie Wu                   | Export Intensity and MNE Customers' Environmental Requirements: Effects on Local Chinese Suppliers' Environment Strategies | 2016 | Emerging markets       |
|     |     | Zhenzhong Ma             |                                                                                                                            |      | Emerging markets       |
|     |     |                          |                                                                                                                            |      | Environment strategies |
|     |     |                          |                                                                                                                            |      | Export intensity       |
|     |     |                          |                                                                                                                            |      | MNE customers          |
|     |     |                          |                                                                                                                            |      | Resource dependence    |
|     |     |                          |                                                                                                                            |      | China                  |
| 354 | JBE | Christiane Marie Høvring | Discursive Tensions in CSR Multi-stakeholder Dialogue: A Foucauldian Perspective                                           | 2016 | Case study             |
|     |     | Sophie Esmann Andersen   |                                                                                                                            |      | Communication          |
|     |     | Anne Ellerup Nielsen     |                                                                                                                            |      | CSR                    |
|     |     |                          |                                                                                                                            |      | Dialogue               |

|     |    |                       |                                                                                                                   |      |                           |
|-----|----|-----------------------|-------------------------------------------------------------------------------------------------------------------|------|---------------------------|
|     |    |                       |                                                                                                                   |      | Discourse                 |
|     |    |                       |                                                                                                                   |      | Foucault                  |
|     |    |                       |                                                                                                                   |      | Multi-stakeholder Tension |
| 355 | MD | Luciano Barin Cruz    | Company and society<br>The “Caras do Brasil” (Faces of Brazil) program as<br>leverage for sustainable development | 2007 | Sustainable development   |
|     |    | Eugenio Avila Pedrozo |                                                                                                                   |      | Fair trade                |
|     |    | Rosangela Bacima      |                                                                                                                   |      | Stakeholder analysis      |
|     |    | Beatriz Queiroz       |                                                                                                                   |      | Brazil                    |
|     |    |                       |                                                                                                                   |      | Retailer                  |







































































\*Nota: ver gráficos de  
conceptos para el paper.















\*Nota: Literature search using  
Web of Science database and  
Bibexcel
